# Supplementary material for: Effects of the Radix Ginseng and Semen Ziziphi Spinosae drug pair on the GLU/GABA-GLN metabolic cycle and the intestinal microflora of insomniac rats based on the brain–gut axis
Source: PubMed Central journal article supplement (PMC9811267; doi:10.3389/fphar.2022.1094507), 2022-12-21
Supplement: DataSheet1.pdf [file DataSheet1.pdf]

DATA of Effects of Radix Ginseng and Semen Ziziphi Spinosae  
Drug Pair on the GLU/GABA-GLN Metabolic Cycle and  
Intestinal Microflora of Insomnia Rats Based on "Brain-Gut  
Axis"(1094507)

Contents

1 Family

2 Genus

3 Pathway

4 Phylum

5 GABA

6 GAD65

7 GLN

8 GLU

9 GS

10 GABAAR  $\alpha$  1

11 GluR-A

12 mGluR5

13 NR1

## family

| ID        | M1       | M2       | M3       | M4       | M5       | M6       | M8       | K1       |
|-----------|----------|----------|----------|----------|----------|----------|----------|----------|
| S24-7     | 0.210736 | 0.139252 | 0.28082  | 0.047558 | 0.138281 | 0.352557 | 0.293147 | 0.126899 |
| [Paraprev | 0.010364 | 0.011606 | 0.111842 | 0.009263 | 0.29332  | 0.031915 | 0.103663 | 0.477724 |
| Ruminococ | 0.036902 | 0.065594 | 0.06085  | 0.01037  | 0.053855 | 0.141731 | 0.072264 | 0.044701 |
| Lachnosp  | 0.096051 | 0.020952 | 0.048539 | 0.021691 | 0.060362 | 0.138335 | 0.10358  | 0.075144 |
| Prevotell | 0.030621 | 0.013867 | 0.066945 | 0.007399 | 0.175636 | 0.026706 | 0.162565 | 0.165625 |
| Erysipelc | 0.146353 | 0.150489 | 0.148654 | 0.357336 | 0.017    | 0.064693 | 0.054003 | 0.00072  |
| Peptostre | 0.041247 | 0.052271 | 0.033315 | 0.135916 | 0.040989 | 0.014044 | 0.010105 | 0.001356 |
| Clostridi | 0.074459 | 0.143947 | 0.027608 | 0.078707 | 0.018631 | 0.007425 | 0.008963 | 0.000614 |
| Turicibac | 0.025256 | 0.046425 | 0.023553 | 0.150442 | 0.008954 | 0.001496 | 0.006569 | 0.000254 |
| Bacteroid | 0.000523 | 0.001174 | 0.001263 | 0.000447 | 0.003615 | 0.000374 | 0.003647 | 0.012669 |
| Desulfovi | 0.00055  | 0.00113  | 0.002137 | 0.000835 | 0.001335 | 0.00259  | 0.004259 | 0.001949 |
| Alcaligen | 0.005208 | 0.005434 | 0.027147 | 0.001981 | 0.004153 | 0.008633 | 0.008824 | 0.00125  |
| [Mogibact | 0.00034  | 0.001391 | 0.001044 | 0.001204 | 0.000704 | 0.000317 | 0.000501 | 0.001102 |
| Corynebac | 0.004973 | 0.005216 | 0.00102  | 0.003593 | 0.000723 | 0.004892 | 0.000668 | 0.000297 |
| Helicobac | 0.000105 | 8.69E-05 | 0.001214 | 0.000175 | 0.001631 | 0.001324 | 0.002032 | 0.001017 |
| Veillonel | 0.000157 | 0.000174 | 0.000947 | 7.77E-05 | 0.000278 | 0.000518 | 0.000473 | 0.000275 |
| Streptocc | 0.002434 | 0.003977 | 0.001263 | 0.007943 | 0.000501 | 0.000691 | 0.004203 | 0.000169 |
| Elusimicr | 0.000314 | 0.000913 | 0.00102  | 0        | 0.000779 | 0.002245 | 0.000139 | 0.000508 |
| Rikenella | 0.000105 | 0.000239 | 0.000898 | 9.71E-05 | 0.000834 | 0.000806 | 0.000696 | 0.001674 |
| Porphyrom | 0.000628 | 0.000413 | 0.000826 | 0.000408 | 0.000519 | 0.000489 | 0.000501 | 0.000826 |
| Coriobact | 0.004004 | 0.010824 | 0.000753 | 0.017497 | 0.000501 | 0.001669 | 0.000612 | 0        |
| Staphyloc | 0.001937 | 0.008585 | 0.000826 | 0.002583 | 0.000797 | 0.003741 | 0.000807 | 0        |
| Peptococc | 0        | 2.17E-05 | 0.000121 | 0        | 0.000371 | 0.000317 | 0.000334 | 0.000254 |
| Anaeropla | 0        | 0        | 0.004638 | 0        | 0        | 0.000201 | 0.000362 | 0.000127 |
| Enterobac | 0.000105 | 6.52E-05 | 0.000486 | 5.83E-05 | 0.000185 | 0.000777 | 0        | 0        |
| Aerococca | 0.000654 | 0.00176  | 0.000777 | 0.000738 | 0.000704 | 0.001698 | 0.000724 | 0        |
| F16       | 0.000157 | 0.002304 | 0.000146 | 0.001476 | 0.000148 | 0.000345 | 0.000139 | 0        |
| Bacillace | 0.002068 | 0.002065 | 0.001845 | 0.006408 | 0.000148 | 0.000345 | 0.000612 | 0        |
| Pseudomon | 0.000236 | 0        | 0        | 0.000952 | 0.00063  | 0.001698 | 0.001253 | 0.001123 |
| Moraxella | 0.000209 | 0.00113  | 0.000243 | 0.000233 | 0.00026  | 0.001727 | 0.000473 | 0.000127 |
| Others    | 0.098171 | 0.072354 | 0.094724 | 0.0535   | 0.169055 | 0.161846 | 0.117582 | 0.083003 |

| K2       | K3       | K4       | K5       | K6       | K7       | DX1      | DX2      | DX3      |
|----------|----------|----------|----------|----------|----------|----------|----------|----------|
| 0.216107 | 0.195174 | 0.18416  | 0.226461 | 0.318892 | 0.101771 | 0.111512 | 0.149883 | 0.134182 |
| 0.145676 | 0.304633 | 0.33487  | 0.173888 | 0.017047 | 0.071072 | 0.446157 | 0.279916 | 0.164729 |
| 0.174794 | 0.048383 | 0.060289 | 0.123558 | 0.264045 | 0.21837  | 0.042732 | 0.06164  | 0.084863 |
| 0.080759 | 0.058101 | 0.037146 | 0.101632 | 0.098334 | 0.270588 | 0.030898 | 0.070917 | 0.084779 |
| 0.16208  | 0.249865 | 0.231039 | 0.115112 | 0.065686 | 0.029604 | 0.179891 | 0.242969 | 0.308735 |
| 0.00171  | 0.001026 | 0.000234 | 0.000797 | 0.00572  | 0.001465 | 0.043421 | 0.038107 | 0.08054  |
| 0.005873 | 0.006769 | 0.007353 | 0.021104 | 0.051288 | 0.020036 | 0.005316 | 0.011778 | 0.002675 |
| 0.00378  | 0.00359  | 0.001998 | 0.008621 | 0.008385 | 0.007079 | 0.002135 | 0.009345 | 0.003633 |
| 0.001553 | 0.001256 | 0.001424 | 0.003737 | 0.004957 | 0.00406  | 0.001935 | 0.008936 | 0.001245 |
| 0.003578 | 0.007743 | 0.016342 | 0.020406 | 0.004388 | 0.001801 | 0.00218  | 0.001592 | 0.004474 |
| 0.006188 | 0.001949 | 0.003591 | 0.005432 | 0.004859 | 0.019136 | 0.002603 | 0.001478 | 0.002775 |
| 0.000765 | 0.001538 | 0.000744 | 0.002915 | 0.012708 | 0.000459 | 0.007052 | 0.002024 | 0.00513  |
| 0.0027   | 0.000692 | 0.000383 | 0.001495 | 0.007622 | 0.003425 | 0.000378 | 0.000546 | 0.002506 |
| 0.000338 | 0.000333 | 0.000255 | 0.000922 | 0.001446 | 0.00196  | 0        | 0.000591 | 0        |
| 0.001125 | 0.000949 | 0.000191 | 0.000324 | 0.002795 | 0.0009   | 0.000578 | 0.000637 | 0.000202 |
| 0.001035 | 0.00041  | 0.000276 | 0.000698 | 0.002031 | 0.002524 | 0.001824 | 0.000432 | 0.004239 |
| 4.50E-05 | 0.000359 | 0.000128 | 0.000174 | 0.000114 | 7.06E-05 | 0.001513 | 0.000205 | 0.004407 |
| 0.00189  | 0.000462 | 0.000723 | 0.000972 | 0.003786 | 0.002136 | 0.000133 | 0.001432 | 0.000269 |
| 0.001485 | 0.001744 | 0.002274 | 0.001993 | 0.001528 | 0.001306 | 0.000845 | 0.000136 | 0.000959 |
| 0.0009   | 0.000769 | 0.001636 | 0.002666 | 0.003266 | 0.000583 | 0.000623 | 0.000114 | 0.001413 |
| 4.50E-05 | 0.000128 | 8.50E-05 | 9.97E-05 | 0.001089 | 0.000212 | 0        | 0.000227 | 0.000521 |
| 0        | 0        | 0        | 0.001071 | 0.000244 | 0.001147 | 0        | 0.00025  | 0        |
| 0.001058 | 0.000103 | 0.000128 | 0.000772 | 0.001771 | 0.002012 | 0.0004   | 0.000387 | 0.000252 |
| 0.0063   | 0        | 0        | 0.003214 | 0.000634 | 0.000141 | 0.000133 | 0        | 0.000101 |
| 0        | 0.000128 | 0.000234 | 0.000199 | 0.00065  | 0        | 0.004093 | 0        | 0.002103 |
| 4.50E-05 | 0.000128 | 0        | 0.000548 | 0.000439 | 0.002383 | 0        | 4.55E-05 | 0        |
| 0.000743 | 0.000282 | 0        | 0.000174 | 0.000845 | 0.001095 | 0        | 0.000159 | 0.000353 |
| 2.25E-05 | 0        | 0.000298 | 7.48E-05 | 0        | 7.06E-05 | 8.90E-05 | 0.000387 | 0        |
| 0.001035 | 0.000718 | 0.000213 | 0.001071 | 0.000861 | 0.000847 | 0.001602 | 0.001205 | 0.000202 |
| 6.75E-05 | 0        | 0.000276 | 0.000174 | 4.88E-05 | 0.001006 | 8.90E-05 | 0.000136 | 0        |
| 0.177471 | 0.112023 | 0.112544 | 0.178522 | 0.112131 | 0.23221  | 0.108953 | 0.105341 | 0.099077 |

| DX4      | DX5      | DX6      | DX7      | G1       | G3       | G4       | G5       | G6       |
|----------|----------|----------|----------|----------|----------|----------|----------|----------|
| 0.153447 | 0.333062 | 0.147594 | 0.217701 | 0.14019  | 0.1563   | 0.133977 | 0.102652 | 0.230337 |
| 0.14563  | 0.069872 | 0.350901 | 0.205436 | 0.031627 | 0.081436 | 0.216225 | 0.224232 | 0.137552 |
| 0.160382 | 0.17059  | 0.054208 | 0.057058 | 0.336623 | 0.122849 | 0.132455 | 0.072443 | 0.228721 |
| 0.212803 | 0.098012 | 0.052415 | 0.032998 | 0.259313 | 0.241731 | 0.128109 | 0.170181 | 0.124735 |
| 0.074641 | 0.038314 | 0.099365 | 0.104034 | 0.035584 | 0.157849 | 0.243068 | 0.271705 | 0.100509 |
| 0.029155 | 0.067512 | 0.057631 | 0.171112 | 0.005431 | 0.003879 | 0.002155 | 0.001185 | 0.001428 |
| 0.013808 | 0.044113 | 0.052641 | 0.041426 | 0.029816 | 0.046884 | 0.009744 | 0.0013   | 0.006334 |
| 0.008863 | 0.016807 | 0.016578 | 0.013693 | 0.014074 | 0.018427 | 0.004474 | 0.000554 | 0.006315 |
| 0.001867 | 0.010784 | 0.011341 | 0.010061 | 0.006833 | 0.034277 | 0.00317  | 0.000249 | 0.001278 |
| 0.002113 | 0.00409  | 0.001155 | 0.002775 | 0.004508 | 0.00647  | 0.004582 | 0.028105 | 0.00374  |
| 0.010094 | 0.003418 | 0.003588 | 0.003    | 0.009087 | 0.004082 | 0.002119 | 0.003346 | 0.002312 |
| 0.001703 | 0.009726 | 0.007341 | 0.008775 | 0.004437 | 0.007035 | 0.001684 | 0.001969 | 0.001767 |
| 0.002462 | 0.00177  | 0.000804 | 0.00049  | 0.005378 | 0.002938 | 0.001395 | 0.001319 | 0.002443 |
| 0.001087 | 0.001038 | 0.000845 | 0.001122 | 0.002112 | 0.000333 | 0.000453 | 0.000134 | 0.00141  |
| 0.000964 | 0.000224 | 0.001052 | 6.12E-05 | 0.001952 | 0.001896 | 0.001069 | 0.001587 | 0.000395 |
| 0.001662 | 0.001668 | 0.00099  | 0.000592 | 0.002076 | 0.001636 | 0.000543 | 0.001568 | 0.000752 |
| 0.000369 | 0.000183 | 0.000804 | 6.12E-05 | 8.87E-05 | 0        | 0.000272 | 0        | 0        |
| 0.004698 | 0.002747 | 0.000907 | 0.000388 | 0.000781 | 0.000159 | 0.001503 | 0.000134 | 0.002932 |
| 0.000759 | 0.001465 | 0.001629 | 0.001428 | 0.002272 | 0.002475 | 0.001069 | 0.001338 | 0.001673 |
| 0.000595 | 0.002381 | 0.000557 | 0.00151  | 0.001668 | 0.002736 | 0.001395 | 0.001702 | 0.001579 |
| 0.000472 | 0.000651 | 0.000454 | 0.00049  | 0.000532 | 0.000217 | 0.000254 | 0        | 0        |
| 0.000985 | 0.000692 | 0.00068  | 0.001469 | 0.000834 | 8.69E-05 | 0.000543 | 3.82E-05 | 0.001541 |
| 0.001067 | 0.002279 | 0.000268 | 0.000367 | 0.002165 | 0.001419 | 0.000761 | 0.001281 | 0.002124 |
| 0        | 0        | 0.000103 | 4.08E-05 | 0        | 0.000217 | 0.001485 | 0.000516 | 0.004417 |
| 0        | 0.000142 | 0.002619 | 2.04E-05 | 0.00055  | 7.24E-05 | 0.000833 | 0        | 0        |
| 0.00039  | 0.000488 | 0.000351 | 0.000959 | 0.000213 | 0.000101 | 0.000235 | 0        | 0.002105 |
| 0.000616 | 0.000244 | 0.000351 | 0.000327 | 0.001597 | 0.000492 | 0.000254 | 0.000249 | 0.000545 |
| 2.05E-05 | 0.000651 | 0.001237 | 0.001816 | 3.55E-05 | 0.000145 | 0.000127 | 0        | 1.88E-05 |
| 0.001046 | 0.00057  | 0.001196 | 0.001286 | 0        | 2.90E-05 | 0        | 0        | 0        |
| 0.000287 | 0.000326 | 0.000103 | 0.001735 | 0.000177 | 0        | 0        | 0        | 0.000263 |
| 0.164054 | 0.112764 | 0.121015 | 0.111707 | 0.099672 | 0.102584 | 0.104073 | 0.111619 | 0.130993 |

| G7       | G8       | Z1       | Z2       | Z3       | Z4       | Z5       | Z6       | Z7       |
|----------|----------|----------|----------|----------|----------|----------|----------|----------|
| 0.266073 | 0.194265 | 0.185588 | 0.141202 | 0.240923 | 0.228816 | 0.28621  | 0.107454 | 0.13662  |
| 0.065014 | 0.09215  | 0.007017 | 0.375198 | 0.137916 | 0.043453 | 0.007435 | 0.02211  | 0.024036 |
| 0.204392 | 0.193368 | 0.401227 | 0.160775 | 0.064887 | 0.219606 | 0.239446 | 0.176961 | 0.086139 |
| 0.163051 | 0.070885 | 0.131599 | 0.105106 | 0.096998 | 0.223179 | 0.1614   | 0.360958 | 0.431224 |
| 0.06022  | 0.148148 | 0.012567 | 0.086524 | 0.324434 | 0.140271 | 0.048378 | 0.1347   | 0.216236 |
| 0.001858 | 0.002521 | 0.002053 | 0.000686 | 0.000505 | 0.000596 | 0.001101 | 0.001529 | 0.005908 |
| 0.043141 | 0.006682 | 0.013289 | 0.009567 | 0.006147 | 0.00251  | 0.033973 | 0.004214 | 0.002778 |
| 0.012994 | 0.002335 | 0.013108 | 0.005031 | 0.004129 | 0.004062 | 0.019958 | 0.007586 | 0.004783 |
| 0.015796 | 0.001387 | 0.010874 | 0.002344 | 0.002477 | 0.000404 | 0.01761  | 0.004665 | 0.001565 |
| 0.004292 | 0.00225  | 0.000361 | 0.001239 | 0.007775 | 0.002403 | 0.005063 | 0.004293 | 0.002655 |
| 0.002448 | 0.019878 | 0.004963 | 0.00425  | 0.000895 | 0.00419  | 0.001492 | 0.015661 | 0.00109  |
| 0.004307 | 0.003806 | 0.005212 | 0.001487 | 0.002156 | 0.001234 | 0.003155 | 0.001274 | 0.001917 |
| 0.002507 | 0.004111 | 0.003181 | 0.001696 | 0.001193 | 0.002042 | 0.004109 | 0.003254 | 0.001565 |
| 0.002729 | 0.001929 | 0.003249 | 0.00162  | 0.000413 | 0.000425 | 0.010908 | 0.000451 | 0.000246 |
| 0.000118 | 0.002335 | 0.001015 | 0.000515 | 0.001881 | 0.002914 | 0.006628 | 0.012506 | 0.000475 |
| 0.001593 | 0.004432 | 0.000902 | 0.001372 | 0.000115 | 0.001212 | 0.000342 | 0.003646 | 0.000703 |
| 0.000265 | 8.46E-05 | 0        | 0.000191 | 0.000183 | 6.38E-05 | 0.000147 | 0.000137 | 5.28E-05 |
| 0.000973 | 0.000508 | 0.001827 | 0.002497 | 0.000528 | 0.000255 | 0.002519 | 0.000804 | 0.00116  |
| 0.001549 | 0.001133 | 0.000361 | 0.001334 | 0.001239 | 0.00034  | 0.001492 | 0.000745 | 0.000369 |
| 0.002478 | 0.000964 | 0.000429 | 0.00082  | 0.002087 | 0.001106 | 0.001076 | 0.000804 | 0.000809 |
| 2.95E-05 | 0.000711 | 0.000654 | 3.81E-05 | 4.59E-05 | 0.000128 | 0.000563 | 0.000137 | 0.000369 |
| 0.002094 | 0.001049 | 0.000745 | 0.000781 | 0.000482 | 0        | 0.002103 | 0.000255 | 5.28E-05 |
| 0.002021 | 0.001996 | 0.000902 | 0.000591 | 0.000596 | 0.001829 | 0.00044  | 0.001196 | 0.000615 |
| 0.000413 | 0.000677 | 0        | 0        | 6.88E-05 | 0        | 7.34E-05 | 0.000196 | 0        |
| 0.000826 | 0.001962 | 0.006114 | 0.000114 | 0.002729 | 0.000149 | 0.003057 | 0.000216 | 3.52E-05 |
| 0.001327 | 0.001303 | 9.02E-05 | 0.000457 | 9.18E-05 | 0        | 0.000856 | 0.000216 | 0        |
| 0.001224 | 0.001489 | 0.000835 | 0.000114 | 0.000138 | 0.000468 | 0.000587 | 0.000686 | 0.001037 |
| 0.000118 | 8.46E-05 | 4.51E-05 | 0.000114 | 4.59E-05 | 0        | 0.000318 | 0.000137 | 0        |
| 0.000147 | 0        | 0        | 0        | 0        | 0        | 0        | 0        | 0        |
| 0.000914 | 0.000829 | 0.000384 | 0.000191 | 0        | 0        | 0.000269 | 0.000118 | 0        |
| 0.133435 | 0.23348  | 0.190484 | 0.093823 | 0.098855 | 0.116896 | 0.138923 | 0.133034 | 0.07675  |

| D1       | D2       | D3       | D4       | D5       | D6       | D7       |
|----------|----------|----------|----------|----------|----------|----------|
| 0.145695 | 0.298746 | 0.357809 | 0.122409 | 0.146534 | 0.245866 | 0.170578 |
| 0.330413 | 0.151793 | 0.051071 | 0.027647 | 0.179713 | 0.102236 | 0.024226 |
| 0.074907 | 0.150372 | 0.140283 | 0.278416 | 0.092506 | 0.145816 | 0.183391 |
| 0.073246 | 0.066008 | 0.07919  | 0.177743 | 0.185075 | 0.135839 | 0.323431 |
| 0.225471 | 0.105688 | 0.117357 | 0.041649 | 0.2005   | 0.194272 | 0.039744 |
| 0.003459 | 0.0167   | 0.013943 | 0.002677 | 0.008475 | 0.003055 | 0.006715 |
| 0.007418 | 0.020353 | 0.042918 | 0.019714 | 0.015473 | 0.009388 | 0.019552 |
| 0.004027 | 0.007468 | 0.016877 | 0.015014 | 0.002154 | 0.002803 | 0.012813 |
| 0.001616 | 0.012003 | 0.009918 | 0.007021 | 0.006714 | 0.002298 | 0.005007 |
| 0.002526 | 0.002915 | 0.002726 | 0.001349 | 0.023728 | 0.015554 | 0.001637 |
| 0.002662 | 0.005183 | 0.001895 | 0.010868 | 0.010189 | 0.004372 | 0.009847 |
| 0.002139 | 0.010815 | 0.009555 | 0.000992 | 0.007092 | 0.004932 | 0.001874 |
| 0.001274 | 0.001692 | 0.002622 | 0.004562 | 0.003082 | 0.00213  | 0.002112 |
| 0.001365 | 0.001692 | 0.000675 | 0.000853 | 0.00022  | 0.00014  | 0.005576 |
| 0.000273 | 0.002447 | 0.001714 | 0.001507 | 0.003223 | 0.001289 | 0.000807 |
| 0.000341 | 0.000756 | 0.000883 | 0.001805 | 0.015158 | 0.000645 | 0.002325 |
| 0.002913 | 0.012111 | 0.003791 | 0.000139 | 0.006746 | 0.000757 | 0.005149 |
| 0.001115 | 0.000936 | 0.00013  | 0.007497 | 0.000692 | 0.007987 | 0.00083  |
| 0.001001 | 0.002519 | 0.001973 | 0.001388 | 0.003318 | 0.003811 | 0.000854 |
| 0.00091  | 0.002159 | 0.001168 | 0.001011 | 0.003161 | 0.00412  | 0.000546 |
| 0.000137 | 0.00135  | 0.000545 | 0.000456 | 0.000299 | 0.000196 | 0.000522 |
| 0.001047 | 0.000828 | 0.000493 | 0.001289 | 0        | 0.000112 | 0.003369 |
| 0.001001 | 0.001512 | 0.001766 | 0.001944 | 0.001195 | 0.002186 | 0.000997 |
| 0.001934 | 0.007558 | 7.79E-05 | 0.000992 | 0        | 0        | 0.002041 |
| 0.000137 | 7.20E-05 | 0.000208 | 0        | 0.000189 | 0        | 0        |
| 0.000796 | 0.001242 | 2.60E-05 | 0.000357 | 3.15E-05 | 0.000112 | 0.003939 |
| 0.00025  | 0.000828 | 0.001013 | 0.001765 | 0.000142 | 0.000252 | 0.000522 |
| 6.83E-05 | 0.000234 | 0.000312 | 0.000535 | 0        | 2.80E-05 | 7.12E-05 |
| 0        | 0        | 0.000156 | 0        | 0        | 0.000813 | 0.000427 |
| 0.000432 | 0.001242 | 0.000104 | 0.000357 | 0        | 8.41E-05 | 0.002041 |
| 0.109425 | 0.095161 | 0.135817 | 0.267805 | 0.081876 | 0.10885  | 0.164598 |

## genus

| ID        | M1       | M2       | M3       | M4       | M5       | M6       | M8       | K1       |
|-----------|----------|----------|----------|----------|----------|----------|----------|----------|
| [Prevotel | 0.009553 | 0.010867 | 0.109754 | 0.008117 | 0.284496 | 0.029843 | 0.092083 | 0.470076 |
| Prevotell | 0.024497 | 0.01278  | 0.045456 | 0.006719 | 0.132089 | 0.01131  | 0.140018 | 0.103976 |
| Oscillosp | 0.001492 | 0.00915  | 0.018284 | 0.00266  | 0.015851 | 0.011856 | 0.018985 | 0.019681 |
| Blautia   | 0.082598 | 0.008216 | 0.004007 | 0.013535 | 0.001817 | 0.004058 | 0.063022 | 0.026884 |
| Allobacul | 0.145437 | 0.150098 | 0.148241 | 0.356539 | 0.016926 | 0.064462 | 0.053864 | 0.000127 |
| Ruminococ | 0.011987 | 0.034536 | 0.015176 | 0.003029 | 0.017538 | 0.04544  | 0.02458  | 0.005847 |
| Paraprevc | 0.000811 | 0.000739 | 0.001578 | 0.001126 | 0.006711 | 0.001871 | 0.010689 | 0.002796 |
| Coprococc | 0.000183 | 0.002326 | 0.003497 | 0.003573 | 0.005339 | 0.004374 | 0.005651 | 0.004004 |
| Clostridi | 0.059384 | 0.131167 | 0.019207 | 0.070007 | 0.011272 | 0.005612 | 0.00451  | 0.000381 |
| Turicibac | 0.025256 | 0.046425 | 0.023553 | 0.150442 | 0.008954 | 0.001496 | 0.006569 | 0.000254 |
| Roseburia | 0.000942 | 0.001022 | 0.006556 | 0.000252 | 0.008695 | 0.019684 | 0.002839 | 0.001504 |
| Bacteroid | 0.000523 | 0.001174 | 0.001263 | 0.000447 | 0.003615 | 0.000374 | 0.003647 | 0.012669 |
| Sutterell | 0.005182 | 0.005173 | 0.027123 | 0.001981 | 0.003875 | 0.008403 | 0.008824 | 0.00125  |
| SMB53     | 0.006072 | 0.001608 | 0.002598 | 0.001573 | 0.003652 | 0.000547 | 0.002477 | 0.000233 |
| Corynebac | 0.004973 | 0.005216 | 0.00102  | 0.003593 | 0.000723 | 0.004892 | 0.000668 | 0.000297 |
| Streptocc | 0.002434 | 0.003564 | 0.001263 | 0.007787 | 0.000501 | 0.000691 | 0.004203 | 0.000169 |
| Lachnospi | 0.000393 | 0        | 7.29E-05 | 0.000272 | 0.000426 | 0.000115 | 0.003034 | 0.001356 |
| Parabacte | 0.000471 | 0.000391 | 0.000801 | 0.000408 | 0.000501 | 0.00046  | 0.000501 | 0.000826 |
| [Ruminocc | 0        | 0        | 0.000704 | 1.94E-05 | 0.00013  | 0        | 0.000501 | 0.000678 |
| Dorea     | 0        | 0.000196 | 0.000194 | 0.00035  | 0.000148 | 0.000489 | 0.000306 | 0.000551 |
| Helicobac | 0        | 0        | 0.000777 | 0        | 0.00089  | 0.001324 | 0.001503 | 0.000826 |
| Anaeropla | 0        | 0        | 0.004638 | 0        | 0        | 0.000201 | 0.000362 | 0.000127 |
| Jeotgalic | 0.001387 | 0.006868 | 0.000704 | 0.002117 | 0.000779 | 0.003482 | 0.000585 | 0        |
| Shigella  | 0.000105 | 6.52E-05 | 0.000219 | 5.83E-05 | 5.56E-05 | 0.000719 | 0        | 0        |
| rc4-4     | 0        | 0        | 0        | 0        | 0.000241 | 0        | 0        | 0.000148 |
| Flexispir | 0.000105 | 8.69E-05 | 0.000437 | 0.000175 | 0.000742 | 0        | 0.000529 | 0.000191 |
| Desulfovi | 0.000471 | 0.000543 | 0.000243 | 0.000699 | 7.42E-05 | 0.000173 | 0.000223 | 2.12E-05 |
| Pseudomon | 0.000236 | 0        | 0        | 0.000952 | 0.00063  | 0.001669 | 0.001197 | 0.001123 |
| Butyricic | 0        | 8.69E-05 | 0        | 9.71E-05 | 0        | 0.000547 | 0        | 0.000699 |
| Lachnospi | 0        | 0        | 0        | 0        | 0.000167 | 0.001151 | 0.000724 | 0        |
| Others    | 0.410689 | 0.331776 | 0.508195 | 0.282358 | 0.468067 | 0.750899 | 0.511608 | 0.342711 |

| K2       | K3       | K4       | K5       | K6       | K7       | DX1      | DX2      | DX3      |
|----------|----------|----------|----------|----------|----------|----------|----------|----------|
| 0.131343 | 0.279377 | 0.296066 | 0.129164 | 0.013326 | 0.060903 | 0.438906 | 0.275187 | 0.153224 |
| 0.141423 | 0.213841 | 0.168052 | 0.098542 | 0.061721 | 0.026144 | 0.133978 | 0.205907 | 0.294538 |
| 0.073086 | 0.019846 | 0.022505 | 0.036153 | 0.057788 | 0.108726 | 0.021377 | 0.019304 | 0.051876 |
| 0.010148 | 0.007308 | 0.002826 | 0.009742 | 0.026196 | 0.000159 | 0.005606 | 0.004502 | 0.026611 |
| 6.75E-05 | 0.000538 | 0        | 0.000623 | 0.004128 | 0.000177 | 0.043243 | 0.038062 | 0.079026 |
| 0.048536 | 0.009974 | 0.010668 | 0.033537 | 0.06814  | 0.060356 | 0.006963 | 0.01296  | 0.011539 |
| 0.012488 | 0.021076 | 0.032216 | 0.040115 | 0.003591 | 0.009762 | 0.00525  | 0.003843 | 0.010799 |
| 0.016449 | 0.017282 | 0.002401 | 0.01642  | 0.005672 | 0.013752 | 0.005962 | 0.001228 | 0.014012 |
| 0.003645 | 0.001359 | 0.000871 | 0.003015 | 0.004306 | 0.006443 | 0.001846 | 0.005139 | 0.00323  |
| 0.001553 | 0.001256 | 0.001424 | 0.003737 | 0.004957 | 0.00406  | 0.001935 | 0.008936 | 0.001245 |
| 0.000428 | 0.002282 | 0.006141 | 0.014302 | 0.006143 | 0.043515 | 0.001535 | 0.010118 | 0.012414 |
| 0.003578 | 0.007743 | 0.016342 | 0.020406 | 0.004388 | 0.001801 | 0.00218  | 0.001592 | 0.004474 |
| 0.000765 | 0.001538 | 0.000744 | 0.002915 | 0.012497 | 0.000459 | 0.007052 | 0.001955 | 0.00513  |
| 0        | 0.002231 | 0.001126 | 0.005407 | 0.003575 | 0        | 0        | 0.001955 | 0.000404 |
| 0.000338 | 0.000333 | 0.000255 | 0.000922 | 0.001446 | 0.00196  | 0        | 0.000591 | 0        |
| 4.50E-05 | 0.000333 | 0.000128 | 0.000174 | 0.000114 | 7.06E-05 | 0.001513 | 0.000205 | 0.004407 |
| 0.000203 | 0.000462 | 0.000319 | 0.000274 | 0.000114 | 0.000741 | 0.000156 | 0.00025  | 5.05E-05 |
| 0.0009   | 0.000769 | 0.001636 | 0.002666 | 0.003234 | 0.000583 | 0.000623 | 0.000114 | 0.001413 |
| 0.001035 | 2.56E-05 | 0.000106 | 0.001196 | 0.002178 | 0.001818 | 0.000601 | 0.000205 | 0.000942 |
| 0.000923 | 0.000462 | 0.000128 | 0.000523 | 0.000683 | 0.000724 | 0.0002   | 0.000637 | 0.000286 |
| 0.000383 | 0.000513 | 0.000191 | 0.000324 | 0.000423 | 0.000759 | 0.000156 | 0.000432 | 8.41E-05 |
| 0.0063   | 0        | 0        | 0.003214 | 0.000634 | 0.000141 | 0.000133 | 0        | 0.000101 |
| 0        | 0        | 0        | 0.000548 | 0.000244 | 0.000706 | 0        | 0.000205 | 0        |
| 0        | 0        | 0.000234 | 4.98E-05 | 0.000634 | 0        | 0.002536 | 0        | 0.001951 |
| 0.000405 | 0        | 0.000128 | 0.000349 | 0.001365 | 0.000741 | 0.000178 | 0.000227 | 0.000135 |
| 0.000743 | 0.000436 | 0        | 0        | 0.002373 | 0.000141 | 0.000423 | 0.000205 | 0.000118 |
| 0.00099  | 7.69E-05 | 6.38E-05 | 0        | 0.000699 | 0.000318 | 4.45E-05 | 0.000273 | 0.000303 |
| 0.001035 | 0.000692 | 0.000128 | 0.001046 | 0.000861 | 0.000847 | 0.001602 | 0.001205 | 0.000202 |
| 0.000833 | 0        | 0        | 0.000174 | 0.001024 | 0.000477 | 0        | 0.000182 | 0        |
| 0        | 0        | 0.000914 | 0.000897 | 0.000325 | 0.000388 | 0        | 0.000136 | 0        |
| 0.541527 | 0.409502 | 0.433219 | 0.572393 | 0.704835 | 0.652797 | 0.313091 | 0.395262 | 0.315851 |



| DX4      | DX5      | DX6      | DX7      | G1       | G3       | G4       | G5       | G6       |
|----------|----------|----------|----------|----------|----------|----------|----------|----------|
| 0.144009 | 0.066311 | 0.338447 | 0.192988 | 0.029355 | 0.05609  | 0.204488 | 0.205839 | 0.125298 |
| 0.059807 | 0.027245 | 0.065797 | 0.079913 | 0.033224 | 0.153043 | 0.217511 | 0.254842 | 0.082185 |
| 0.0603   | 0.043441 | 0.026001 | 0.017428 | 0.139427 | 0.039618 | 0.029596 | 0.032675 | 0.021463 |
| 0.005252 | 0.028344 | 0.003505 | 0.004592 | 0.077558 | 0.144199 | 0.044973 | 0.0456   | 0.049465 |
| 0.028519 | 0.066637 | 0.057508 | 0.170888 | 0.001136 | 0.001476 | 0.001503 | 0.000459 | 0.000319 |
| 0.037998 | 0.026756 | 0.010186 | 0.01004  | 0.054965 | 0.016965 | 0.044067 | 0.018718 | 0.045105 |
| 0.001518 | 0.003337 | 0.011011 | 0.010999 | 0.002201 | 0.024709 | 0.010686 | 0.014072 | 0.011164 |
| 0.005437 | 0.006755 | 0.001175 | 0.009734 | 0.039862 | 0.009206 | 0.019924 | 0.019196 | 0.02135  |
| 0.006319 | 0.011984 | 0.009299 | 0.008551 | 0.009335 | 0.011623 | 0.0023   | 0.000554 | 0.005356 |
| 0.001867 | 0.010784 | 0.011341 | 0.010061 | 0.006833 | 0.034277 | 0.00317  | 0.000249 | 0.001278 |
| 0.039988 | 0.002442 | 0.002041 | 0        | 0.012459 | 0.007107 | 0.001123 | 0.003136 | 0.0053   |
| 0.002113 | 0.00409  | 0.001155 | 0.002775 | 0.004508 | 0.00647  | 0.004582 | 0.028105 | 0.00374  |
| 0.001703 | 0.009665 | 0.007341 | 0.008122 | 0.004437 | 0.007035 | 0.001503 | 0.001969 | 0.001767 |
| 0.001334 | 0.003785 | 0.005485 | 0.003979 | 0.003851 | 0.006036 | 0.002065 | 0        | 0.000958 |
| 0.001087 | 0.001038 | 0.000845 | 0.001122 | 0.002112 | 0.000333 | 0.000453 | 0.000134 | 0.00141  |
| 0.000349 | 0.000183 | 0.000804 | 6.12E-05 | 8.87E-05 | 0        | 0.000272 | 0        | 0        |
| 0.000164 | 0.000488 | 0.000124 | 0.000347 | 0.016754 | 0.000391 | 0.004673 | 0.000421 | 0.002594 |
| 0.000595 | 0.00234  | 0.000557 | 0.00151  | 0.001668 | 0.002736 | 0.001395 | 0.001702 | 0.001579 |
| 0.000698 | 0.002136 | 0.002845 | 0.000531 | 0.002272 | 0.001534 | 0.001684 | 0.001396 | 0.000639 |
| 0.002708 | 0.000671 | 0.000969 | 0.000429 | 0.001171 | 0.001057 | 0.000724 | 0.000803 | 0.000357 |
| 0.000964 | 0.000224 | 0.00068  | 6.12E-05 | 0.001278 | 0.000449 | 0.000362 | 0.001109 | 0.000263 |
| 0        | 0        | 0.000103 | 4.08E-05 | 0        | 0.000217 | 0.001485 | 0.000516 | 0.004417 |
| 0.000882 | 0.000651 | 0.000536 | 0.001163 | 0.000692 | 8.69E-05 | 0.00038  | 3.82E-05 | 0.001372 |
| 0        | 0.000142 | 0.001732 | 2.04E-05 | 0.000515 | 7.24E-05 | 0.000761 | 0        | 0        |
| 0.000431 | 0.001974 | 0.000144 | 0.000224 | 0.001597 | 0.001071 | 0.000598 | 0.001013 | 0.001635 |
| 0        | 0        | 0.000371 | 0        | 0.000674 | 0.001447 | 0.000543 | 0.000363 | 0.000132 |
| 0.001785 | 0.000163 | 0.000227 | 0.000449 | 0.002236 | 0.000579 | 0.000181 | 0.00044  | 0.000413 |
| 0.001046 | 0.000549 | 0.001196 | 0.001265 | 0        | 2.90E-05 | 0        | 0        | 0        |
| 0.000349 | 0.000529 | 0.000309 | 0        | 0.00197  | 0.000999 | 0.000543 | 0        | 0.000207 |
| 0.000267 | 0        | 0.001196 | 0        | 0.002059 | 0        | 0.000851 | 0.00174  | 0        |
| 0.588552 | 0.673917 | 0.427935 | 0.456646 | 0.54539  | 0.469899 | 0.395628 | 0.364319 | 0.60845  |

| G7       | G8       | Z1       | Z2       | Z3       | Z4       | Z5       | Z6       | Z7       |
|----------|----------|----------|----------|----------|----------|----------|----------|----------|
| 0.05584  | 0.06449  | 0.005009 | 0.373654 | 0.073236 | 0.040029 | 0.006188 | 0.020797 | 0.020467 |
| 0.053495 | 0.14204  | 0.010784 | 0.057517 | 0.302576 | 0.127446 | 0.045297 | 0.131329 | 0.207462 |
| 0.040929 | 0.079428 | 0.062269 | 0.039774 | 0.015253 | 0.033329 | 0.043609 | 0.066252 | 0.029961 |
| 0.027123 | 0.005041 | 0.014123 | 0.035715 | 0.041767 | 0.110813 | 0.053686 | 0.014936 | 0.376787 |
| 0.001077 | 0.000406 | 0.001286 | 7.62E-05 | 0.000138 | 0        | 0.000245 | 0.000176 | 0.00473  |
| 0.059055 | 0.078565 | 0.052455 | 0.021116 | 0.016789 | 0.054832 | 0.064203 | 0.048631 | 0.023807 |
| 0.00879  | 0.026848 | 0.001985 | 0.001029 | 0.062134 | 0.003297 | 0.00115  | 0.001137 | 0.00327  |
| 0.049468 | 0.014109 | 0.015161 | 0.0081   | 0.003876 | 0.018228 | 0.005307 | 0.038105 | 0.004554 |
| 0.008186 | 0.002318 | 0.009521 | 0.002535 | 0.0025   | 0.003169 | 0.012792 | 0.006958 | 0.004308 |
| 0.015796 | 0.001387 | 0.010874 | 0.002344 | 0.002477 | 0.000404 | 0.01761  | 0.004665 | 0.001565 |
| 0.004262 | 0.00159  | 0.005753 | 0.01092  | 0.007363 | 0.018419 | 0.004402 | 0.002607 | 0.000422 |
| 0.004292 | 0.00225  | 0.000361 | 0.001239 | 0.007775 | 0.002403 | 0.005063 | 0.004293 | 0.002655 |
| 0.004203 | 0.003739 | 0.005212 | 0.001487 | 0.002156 | 0.001234 | 0.003131 | 0.001156 | 0.001917 |
| 0.004543 | 0        | 0.002775 | 0.00242  | 0.001468 | 0.000787 | 0.006163 | 0.000627 | 0.000475 |
| 0.002729 | 0.001929 | 0.003249 | 0.00162  | 0.000413 | 0.000425 | 0.010908 | 0.000451 | 0.000246 |
| 0.000265 | 8.46E-05 | 0        | 0.000191 | 0.000183 | 6.38E-05 | 0.000147 | 0.000137 | 5.28E-05 |
| 0.004469 | 8.46E-05 | 0.000226 | 0.002973 | 0.001812 | 0.000957 | 0.000978 | 0.000294 | 0.000193 |
| 0.002478 | 0.000964 | 0.000429 | 0.00082  | 0.002087 | 0.001106 | 0.001076 | 0.000804 | 0.000809 |
| 0.001327 | 0.004991 | 0.001444 | 0.00082  | 2.29E-05 | 0.000447 | 0.00115  | 0.00198  | 0.000545 |
| 0.000929 | 0.00022  | 0.000654 | 0        | 0.000459 | 0.000659 | 0.000514 | 7.84E-05 | 0.003816 |
| 0.000118 | 0.002047 | 0.000812 | 0.000515 | 0.001239 | 0.001787 | 0.006628 | 0.007037 | 8.79E-05 |
| 0.000413 | 0.000677 | 0        | 0        | 6.88E-05 | 0        | 7.34E-05 | 0.000196 | 0        |
| 0.002006 | 0.000964 | 0.000745 | 0.000686 | 0.000482 | 0        | 0.00181  | 0.000176 | 0        |
| 0.000782 | 0.001861 | 0.005956 | 9.53E-05 | 0.002569 | 0        | 0.002788 | 0.000137 | 0        |
| 0.001622 | 0.000389 | 0.000384 | 0.000172 | 0.000505 | 0.00134  | 0.000318 | 0.000412 | 0.000422 |
| 0        | 0.000288 | 0.000203 | 0        | 0.000642 | 0.001127 | 0        | 0.005312 | 0.000299 |
| 0.000339 | 0.002165 | 0.000564 | 0.000248 | 0.000138 | 0.000425 | 0        | 0.00096  | 0.000299 |
| 2.95E-05 | 0        | 0        | 0        | 0        | 0        | 0        | 0        | 0        |
| 0.000383 | 0.0011   | 0.000564 | 0.000896 | 0.000115 | 0.000447 | 0.000391 | 0.000764 | 0.000141 |
| 0        | 0.000372 | 0        | 0.00101  | 0        | 0.000553 | 0.000342 | 0        | 0        |
| 0.643457 | 0.556403 | 0.786278 | 0.431781 | 0.449758 | 0.574826 | 0.703664 | 0.639532 | 0.309901 |

| D1       | D2       | D3       | D4       | D5       | D6       | D7       |
|----------|----------|----------|----------|----------|----------|----------|
| 0.32345  | 0.099696 | 0.014722 | 0.021023 | 0.13331  | 0.068858 | 0.02107  |
| 0.206653 | 0.090248 | 0.111878 | 0.040935 | 0.19844  | 0.189311 | 0.037774 |
| 0.019296 | 0.036999 | 0.033831 | 0.102913 | 0.032706 | 0.058377 | 0.046957 |
| 0.001115 | 0.01463  | 0.003064 | 0.003808 | 0.089188 | 0.067205 | 0.014972 |
| 0.003072 | 0.015674 | 0.013631 | 0.001825 | 0.004576 | 0.000589 | 0.00624  |
| 0.017817 | 0.041318 | 0.068181 | 0.063942 | 0.019718 | 0.016563 | 0.041761 |
| 0.005256 | 0.050658 | 0.035622 | 0.006426 | 0.046308 | 0.032201 | 0.003108 |
| 0.017452 | 0.003419 | 0.017032 | 0.026596 | 0.007752 | 0.002046 | 0.022257 |
| 0.003732 | 0.005255 | 0.012073 | 0.010789 | 0.00184  | 0.001177 | 0.006857 |
| 0.001616 | 0.012003 | 0.009918 | 0.007021 | 0.006714 | 0.002298 | 0.005007 |
| 0.008715 | 0.006029 | 0.001039 | 0.016184 | 0.00607  | 0.006334 | 0.035971 |
| 0.002526 | 0.002915 | 0.002726 | 0.001349 | 0.023728 | 0.015554 | 0.001637 |
| 0.002116 | 0.010815 | 0.009555 | 0.000992 | 0.007092 | 0.004932 | 0.00178  |
| 0        | 0.001728 | 0.002674 | 0.00357  | 0        | 0.001625 | 0.004081 |
| 0.001365 | 0.001692 | 0.000675 | 0.000853 | 0.00022  | 0.00014  | 0.005576 |
| 0.002913 | 0.011859 | 0.003791 | 0.000139 | 0.006746 | 0.000757 | 0.005149 |
| 0.000159 | 0.000144 | 0        | 0.000278 | 0.006777 | 0.000336 | 0.001163 |
| 0.00091  | 0.002159 | 0.001168 | 0.001011 | 0.003145 | 0.004064 | 0.000546 |
| 0.000614 | 0.001566 | 0.000623 | 0.003272 | 0.006761 | 0.001149 | 0.002278 |
| 0.001684 | 0.001404 | 0.001194 | 0.000972 | 0.007673 | 0.00269  | 0.002041 |
| 0.000273 | 0.00117  | 0.000675 | 0.001368 | 0.001054 | 0.001037 | 0.000569 |
| 0.001934 | 0.007558 | 7.79E-05 | 0.000992 | 0        | 0        | 0.002041 |
| 0.000751 | 0.000792 | 0.000338 | 0.001051 | 0        | 0        | 0.002824 |
| 0.000137 | 7.20E-05 | 0.000208 | 0        | 0.000189 | 0        | 0        |
| 0.000523 | 0.000864 | 0.00109  | 0.000873 | 0.000865 | 0.001962 | 0.000285 |
| 0        | 0.001278 | 0.001039 | 0.000139 | 0.00217  | 0.000252 | 0.000237 |
| 0.000205 | 0.000738 | 0.000779 | 0.000714 | 0.000676 | 0.000336 | 0.000878 |
| 0        | 0        | 0.000156 | 0        | 0        | 0.000813 | 0.000403 |
| 0.000228 | 0.000432 | 0.000467 | 0.000714 | 0.001887 | 0.00042  | 0.000403 |
| 0.000273 | 5.40E-05 | 0        | 0.00123  | 0.000472 | 0.000953 | 0        |
| 0.373214 | 0.559215 | 0.648786 | 0.678785 | 0.381408 | 0.517964 | 0.721675 |

| pathway             | descript | logFC  | SE     | Pvalues  | adjPvalues |
|---------------------|----------|--------|--------|----------|------------|
| 3-HYDROXY4-hydroxy  |          | 1.564  | 1.244  | 0.2088   | 0.8498     |
| P341-PWY glycolysi  |          | 1.262  | 1      | 0.2069   | 0.8498     |
| PWY-7013 L-1,2-prc  |          | 1.167  | 0.5864 | 0.04657  | 0.6049     |
| PWY-7237 myo-, chi  |          | 1.136  | 0.5053 | 0.0246   | 0.4534     |
| P163-PWY L-lysine   |          | 1.107  | 0.5341 | 0.0382   | 0.5834     |
| PWY-6478 GDP-D-gly  |          | 1.106  | 1.158  | 0.3397   | 0.8498     |
| GLUCARDEGD-glucara  |          | 1.084  | 0.6745 | 0.1079   | 0.8498     |
| PWY-5677 succinate  |          | 1.062  | 0.6232 | 0.08825  | 0.8498     |
| NAD-BIOSYNAD salva  |          | 1.059  | 0.5242 | 0.04342  | 0.6001     |
| GALACTARCD-galacta  |          | 1.055  | 0.6367 | 0.09759  | 0.8498     |
| GLUCARGAL superpath |          | 1.055  | 0.6367 | 0.09759  | 0.8498     |
| PWY-6749 CMP-legic  |          | 0.9977 | 0.502  | 0.04689  | 0.6049     |
| FUC-RHAMC superpath |          | 0.9424 | 0.4374 | 0.03121  | 0.5251     |
| PWY-7446 sulfoglyc  |          | 0.9332 | 0.958  | 0.33     | 0.8498     |
| PWY-7374 1,4-dihyd  |          | 0.9321 | 0.6875 | 0.1752   | 0.8498     |
| PWY-7371 1,4-dihyd  |          | 0.9259 | 0.7069 | 0.1902   | 0.8498     |
| PWY-6629 superpath  |          | 0.9081 | 0.9739 | 0.3511   | 0.8498     |
| PWY-5676 acetyl-Cc  |          | 0.9012 | 0.4301 | 0.03613  | 0.5827     |
| PWY-6263 superpath  |          | 0.8867 | 0.6748 | 0.1888   | 0.8498     |
| KETOGLUCCketogluc   |          | 0.8803 | 0.8915 | 0.3234   | 0.8498     |
| LPSSYN-PW superpath |          | 0.8697 | 0.9777 | 0.3737   | 0.8498     |
| PWY-7332 superpath  |          | 0.8209 | 0.7657 | 0.2837   | 0.8498     |
| PWY-5705 allantoin  |          | 0.8198 | 0.3976 | 0.03919  | 0.5834     |
| ECASYN-PW enterobac |          | 0.7672 | 0.9402 | 0.4145   | 0.8498     |
| PWY-6641 superpath  |          | 0.7511 | 0.771  | 0.33     | 0.8498     |
| PWY-6572 chondroit  |          | 0.7174 | 0.8915 | 0.421    | 0.8498     |
| REDCITCYCTCA cycle  |          | 0.6917 | 0.3904 | 0.07646  | 0.8354     |
| PWY-6588 pyruvate   |          | 0.6901 | 0.4133 | 0.09501  | 0.8498     |
| FUCCAT-PWfucose de  |          | 0.6844 | 0.6427 | 0.287    | 0.8498     |
| P162-PWY L-glutama  |          | 0.6763 | 0.6874 | 0.3252   | 0.8498     |
| PWY-7315 dTDP-N-ac  |          | 0.6738 | 0.5369 | 0.2094   | 0.8498     |
| P562-PWY myo-inosi  |          | 0.6575 | 0.4871 | 0.1771   | 0.8498     |
| PWY-7328 superpath  |          | 0.6557 | 0.6594 | 0.32     | 0.8498     |
| PWY-1622 formaldeh  |          | 0.644  | 0.3327 | 0.05293  | 0.6401     |
| PWY-5177 glutaryl-  |          | 0.6367 | 0.5488 | 0.2459   | 0.8498     |
| PWY-5971 palmitate  |          | 0.6284 | 0.6773 | 0.3535   | 0.8498     |
| PWY-6282 palmitole  |          | 0.6169 | 0.8476 | 0.4667   | 0.8498     |
| PWY-5989 stearate   |          | 0.6158 | 0.8543 | 0.471    | 0.8498     |
| FASYN-INI superpath |          | 0.6153 | 0.8572 | 0.4728   | 0.8498     |
| PWY-7664 oleate bi  |          | 0.5986 | 0.8214 | 0.4662   | 0.8498     |
| GALACTURCD-galactu  |          | 0.5896 | 0.4045 | 0.145    | 0.8498     |
| GALACT-GL superpath |          | 0.5874 | 0.4166 | 0.1586   | 0.8498     |
| GLUCUROCA superpath |          | 0.5758 | 0.409  | 0.1591   | 0.8498     |
| PWYG-321 mycolate   |          | 0.5729 | 0.8148 | 0.482    | 0.8498     |
| PWY-6467 Kdo trans  |          | 0.5441 | 0.6768 | 0.4215   | 0.8498     |
| NAGLIPASYlipid IVA  |          | 0.5427 | 0.679  | 0.4241   | 0.8498     |
| PWY0-862 (5Z)-dode  |          | 0.5406 | 0.7983 | 0.4983   | 0.8498     |
| ORNDEG-PW superpath |          | 0.5241 | 0.3132 | 0.09424  | 0.8498     |
| PWY-7373 superpath  |          | 0.5139 | 1.051  | 0.6249   | 0.8762     |
| PWY-5531 chlorophy  |          | 0.5134 | 0.1928 | 0.007754 | 0.2        |

|                    |        |        |          |        |
|--------------------|--------|--------|----------|--------|
| PWY-7159 chlorophy | 0.5134 | 0.1928 | 0.007754 | 0.2    |
| PWY-7198 pyrimidin | 0.5103 | 0.896  | 0.569    | 0.8498 |
| PWY-6471 peptidogl | 0.5055 | 0.3634 | 0.1641   | 0.8498 |
| PWY0-1241ADP-L-gly | 0.5053 | 0.5684 | 0.374    | 0.8498 |
| PWY-7210 pyrimidin | 0.5022 | 0.8401 | 0.55     | 0.8498 |
| PWY-1269 CMP-3-dec | 0.5016 | 0.6455 | 0.4371   | 0.8498 |
| PWY-5304 superpath | 0.4927 | 0.59   | 0.4037   | 0.8498 |
| PWY-6519 8-amino-7 | 0.4892 | 0.6824 | 0.4734   | 0.8498 |
| FAO-PWY fatty aci  | 0.4503 | 0.4409 | 0.3071   | 0.8498 |
| COBALSYN-adenosylc | 0.4393 | 0.2952 | 0.1367   | 0.8498 |
| BIOTIN-BIbiotin bi | 0.4343 | 0.6024 | 0.471    | 0.8498 |
| PWY-7323 superpath | 0.432  | 0.4894 | 0.3774   | 0.8498 |
| PWY-6269 adenosylc | 0.428  | 0.2974 | 0.15     | 0.8498 |
| PWY-5509 adenosylc | 0.4248 | 0.2983 | 0.1544   | 0.8498 |
| PWY-7254 TCA cycle | 0.4205 | 0.5179 | 0.4168   | 0.8498 |
| PWY0-1586peptidogl | 0.4153 | 0.3299 | 0.2081   | 0.8498 |
| PWY-6703 preQ0 bic | 0.4024 | 0.4421 | 0.3627   | 0.8498 |
| PWY-6507 4-deoxy-L | 0.4001 | 0.4816 | 0.4061   | 0.8498 |
| PWY-5741 ethylmalc | 0.3811 | 0.6319 | 0.5464   | 0.8498 |
| KDO-NAGLIsuperpath | 0.3728 | 1.214  | 0.7587   | 0.9411 |
| PWY0-1533methylphc | 0.3716 | 0.8965 | 0.6785   | 0.915  |
| CENTFERM-pyruvate  | 0.3648 | 0.4468 | 0.4142   | 0.8498 |
| PWY-6590 superpath | 0.3589 | 0.4402 | 0.4149   | 0.8498 |
| FASYN-ELCfatty aci | 0.3534 | 0.3451 | 0.3059   | 0.8498 |
| METHGLYUTsuperpath | 0.349  | 0.9055 | 0.6999   | 0.9163 |
| PWY-7242 D-fructur | 0.3394 | 0.3352 | 0.3113   | 0.8498 |
| SO4ASSIM-sulfate r | 0.3317 | 0.3709 | 0.3712   | 0.8498 |
| SULFATE-Csuperpath | 0.3306 | 0.3524 | 0.3482   | 0.8498 |
| HISDEG-PWL-histidi | 0.322  | 0.5564 | 0.5627   | 0.8498 |
| PWY-7090 UDP-2,3-d | 0.3211 | 0.556  | 0.5636   | 0.8498 |
| P42-PWY incomplet  | 0.308  | 0.3905 | 0.4303   | 0.8498 |
| PYRIDNUCSNAD biosy | 0.2916 | 0.3008 | 0.3324   | 0.8498 |
| GLYCOL-GLsuperpath | 0.2908 | 0.3396 | 0.3918   | 0.8498 |
| SER-GLYSYsuperpath | 0.2902 | 0.2821 | 0.3035   | 0.8498 |
| PWY-6969 TCA cycle | 0.2889 | 0.3241 | 0.3727   | 0.8498 |
| PWY-7663 gondoate  | 0.287  | 0.2636 | 0.2762   | 0.8498 |
| PWY-5973 cis-vacce | 0.2853 | 0.2674 | 0.2859   | 0.8498 |
| GLUCONEO-gluconeog | 0.2827 | 0.2961 | 0.3396   | 0.8498 |
| THISYN-PWsuperpath | 0.2779 | 0.3453 | 0.4209   | 0.8498 |
| TRPSYN-PWL-tryptop | 0.2773 | 0.2787 | 0.3197   | 0.8498 |
| CALVIN-PWCalvin-Be | 0.2728 | 0.2816 | 0.3326   | 0.8498 |
| PWY-6700 queuosine | 0.2718 | 0.3612 | 0.4517   | 0.8498 |
| COLANSYN-colanic a | 0.2693 | 0.4453 | 0.5453   | 0.8498 |
| PWY-5154 L-arginin | 0.2601 | 0.4236 | 0.5391   | 0.8498 |
| POLYISOPRpolyisopr | 0.247  | 0.3588 | 0.4913   | 0.8498 |
| ALL-CHORIsuperpath | 0.246  | 0.6295 | 0.6959   | 0.9163 |
| PPGPPMET-ppGpp bic | 0.2441 | 0.6302 | 0.6985   | 0.9163 |
| CHLOROPHYchlorophy | 0.2407 | 0.1015 | 0.01775  | 0.3815 |
| PYRIDNUCSNAD salva | 0.2404 | 0.2996 | 0.4223   | 0.8498 |
| P261-PWY coenzyme  | 0.24   | 0.1183 | 0.04243  | 0.6001 |
| PWY-5505 L-glutama | 0.2385 | 0.2851 | 0.4027   | 0.8498 |

|                     |        |        |        |        |
|---------------------|--------|--------|--------|--------|
| P108-PWY pyruvate   | 0.2326 | 0.304  | 0.4443 | 0.8498 |
| PWY-6737 starch de  | 0.2225 | 0.2683 | 0.4068 | 0.8498 |
| PANTOSYN-pantothen  | 0.2201 | 0.3062 | 0.4723 | 0.8498 |
| PWY-6147 6-hydroxy  | 0.2156 | 0.3262 | 0.5087 | 0.8498 |
| PWY-7539 6-hydroxy  | 0.2126 | 0.3258 | 0.514  | 0.8498 |
| GLYCOLYSI superpath | 0.2125 | 0.3294 | 0.5188 | 0.8498 |
| COA-PWY coenzyme    | 0.2102 | 0.2795 | 0.452  | 0.8498 |
| PWY-6163 chorismat  | 0.2091 | 0.2748 | 0.4467 | 0.8498 |
| PANTO-PWY phosphopa | 0.209  | 0.3169 | 0.5095 | 0.8498 |
| PWY-6895 superpath  | 0.2086 | 0.361  | 0.5633 | 0.8498 |
| PWY-5529 superpath  | 0.2064 | 0.1493 | 0.1669 | 0.8498 |
| RIBOSYN2-flavin bi  | 0.2014 | 0.2988 | 0.5003 | 0.8498 |
| PWY-5104 L-isoleuc  | 0.2006 | 0.2575 | 0.4358 | 0.8498 |
| FERMENTAI mixed aci | 0.2003 | 0.2593 | 0.4397 | 0.8498 |
| PWY-5695 urate bic  | 0.1999 | 0.3194 | 0.5313 | 0.8498 |
| NONMEVIP methylery  | 0.1997 | 0.2773 | 0.4714 | 0.8498 |
| PWY-7560 methylery  | 0.1997 | 0.2773 | 0.4714 | 0.8498 |
| PWY-6123 inosine-5  | 0.1989 | 0.2849 | 0.485  | 0.8498 |
| ICMET2-PWN10-formy  | 0.1984 | 0.2733 | 0.468  | 0.8498 |
| PWY-5101 L-isoleuc  | 0.1959 | 0.2517 | 0.4364 | 0.8498 |
| GLYCOGENS glycogen  | 0.1958 | 0.2621 | 0.4551 | 0.8498 |
| ILEUSYN-FL-isoleuc  | 0.195  | 0.2549 | 0.4442 | 0.8498 |
| VALSYN-PWL-valine   | 0.195  | 0.2549 | 0.4442 | 0.8498 |
| PWY-5121 superpath  | 0.1944 | 0.277  | 0.4826 | 0.8498 |
| ASPASN-PW superpath | 0.1938 | 0.2919 | 0.5068 | 0.8498 |
| PWY-6612 superpath  | 0.1907 | 0.32   | 0.5514 | 0.8498 |
| PWY-2942 L-lysine   | 0.1901 | 0.2728 | 0.4858 | 0.8498 |
| GLUTORN-FL-ornithi  | 0.19   | 0.2877 | 0.5089 | 0.8498 |
| PWY-5686 UMP biosy  | 0.1892 | 0.2734 | 0.4889 | 0.8498 |
| FOLSYN-PW superpath | 0.1867 | 0.3003 | 0.5341 | 0.8498 |
| PWY-6892 thiazole   | 0.1865 | 0.2834 | 0.5105 | 0.8498 |
| ARO-PWY chorismat   | 0.1857 | 0.2663 | 0.4857 | 0.8498 |
| PWY-5103 L-isoleuc  | 0.1852 | 0.2473 | 0.4541 | 0.8498 |
| PWY-7219 adenosine  | 0.185  | 0.2729 | 0.498  | 0.8498 |
| PWY-7208 superpath  | 0.1833 | 0.2676 | 0.4933 | 0.8498 |
| PWY-7347 sucrose k  | 0.1815 | 0.8616 | 0.8332 | 0.9413 |
| COMPLETE- superpath | 0.1805 | 0.2661 | 0.4974 | 0.8498 |
| P441-PWY superpath  | 0.179  | 0.2982 | 0.5483 | 0.8498 |
| PWY-7199 pyrimidin  | 0.1779 | 0.3093 | 0.5652 | 0.8498 |
| ANAGLYCOL glycolysi | 0.1777 | 0.2697 | 0.51   | 0.8498 |
| HISTSYN-FL-histidi  | 0.1772 | 0.2568 | 0.4902 | 0.8498 |
| PWY-5097 L-lysine   | 0.1753 | 0.2709 | 0.5175 | 0.8498 |
| TRNA-CHAR tRNA char | 0.1744 | 0.2724 | 0.522  | 0.8498 |
| PWY-6121 5-amino in | 0.1724 | 0.2657 | 0.5163 | 0.8498 |
| PWY-5088 L-glutama  | 0.1721 | 0.668  | 0.7967 | 0.9413 |
| PWY-6126 superpath  | 0.1719 | 0.2758 | 0.5331 | 0.8498 |
| DTDPRHAMS dTDP-L-rh | 0.1713 | 0.2843 | 0.547  | 0.8498 |
| PEPTIDOGL peptidogl | 0.1712 | 0.2727 | 0.5301 | 0.8498 |
| PWY-6122 5-amino in | 0.1711 | 0.2671 | 0.5218 | 0.8498 |
| PWY-6277 superpath  | 0.1711 | 0.2671 | 0.5218 | 0.8498 |
| BRANCHED- superpath | 0.1698 | 0.2475 | 0.4926 | 0.8498 |

|            |           |        |         |        |        |
|------------|-----------|--------|---------|--------|--------|
| PWY-6385   | peptidogl | 0.1698 | 0.273   | 0.534  | 0.8498 |
| PWY-6387   | UDP-N-ace | 0.1698 | 0.2723  | 0.5329 | 0.8498 |
| PWY-6386   | UDP-N-ace | 0.1695 | 0.2726  | 0.5342 | 0.8498 |
| TCA        | TCA cycle | 0.1693 | 0.3181  | 0.5946 | 0.8606 |
| PWY-7229   | superpath | 0.1687 | 0.2756  | 0.5406 | 0.8498 |
| PWY-3001   | superpath | 0.1643 | 0.2435  | 0.4999 | 0.8498 |
| PWY-6897   | thiamin s | 0.1627 | 0.283   | 0.5654 | 0.8498 |
| THRESYN-F  | superpath | 0.1626 | 0.2434  | 0.504  | 0.8498 |
| PWY-6608   | guanosine | 0.1617 | 0.2975  | 0.5866 | 0.8567 |
| PWY-7111   | pyruvate  | 0.1608 | 0.2777  | 0.5626 | 0.8498 |
| PWY0-1338  | polymyxin | 0.16   | 1.05    | 0.8789 | 0.9657 |
| NONOXIPEN  | pentose p | 0.1583 | 0.2711  | 0.5591 | 0.8498 |
| PWY-5667   | CDP-diacy | 0.1568 | 0.2771  | 0.5714 | 0.8498 |
| PWY0-1319  | CDP-diacy | 0.1568 | 0.2771  | 0.5714 | 0.8498 |
| PWY-5100   | pyruvate  | 0.1564 | 0.2728  | 0.5663 | 0.8498 |
| PWY0-1061  | superpath | 0.1545 | 0.7047  | 0.8265 | 0.9413 |
| DAPLYSINEL | lysine    | 0.1532 | 0.2789  | 0.5827 | 0.8542 |
| METH-ACET  | methanoge | 0.1521 | 0.5667  | 0.7884 | 0.9413 |
| PWY-7221   | guanosine | 0.1507 | 0.2711  | 0.5782 | 0.8508 |
| SALVADEHY  | adenosine | 0.1491 | 0.2995  | 0.6185 | 0.8704 |
| PWY-6353   | purine nu | 0.1448 | 0.268   | 0.589  | 0.857  |
| PWY0-162   | superpath | 0.1424 | 0.3937  | 0.7176 | 0.9257 |
| GLYCOCAT   | glycogen  | 0.1412 | 0.2695  | 0.6003 | 0.8606 |
| PWY-841    | superpath | 0.141  | 0.3741  | 0.7062 | 0.9163 |
| PWY-7196   | superpath | 0.1406 | 0.4399  | 0.7492 | 0.9366 |
| PWY-6545   | pyrimidin | 0.1405 | 0.3294  | 0.6698 | 0.9064 |
| PWY-7220   | adenosine | 0.136  | 0.2992  | 0.6495 | 0.8928 |
| PWY-7222   | guanosine | 0.136  | 0.2992  | 0.6495 | 0.8928 |
| PWY0-41    | allantoin | 0.1353 | 0.9786  | 0.8901 | 0.973  |
| UBISYN-PW  | superpath | 0.1284 | 0.558   | 0.818  | 0.9413 |
| PHOSLIPSY  | superpath | 0.1276 | 0.2817  | 0.6506 | 0.8928 |
| PYRIDOXSYP | pyridoxal | 0.1274 | 0.5856  | 0.8278 | 0.9413 |
| ARGSYNBSUL | arginin   | 0.1263 | 0.2919  | 0.6652 | 0.9033 |
| METHYLGAL  | methylgal | 0.1262 | 0.09744 | 0.1951 | 0.8498 |
| PWY-5855   | ubiquinol | 0.1253 | 0.5543  | 0.8211 | 0.9413 |
| PWY-5856   | ubiquinol | 0.1253 | 0.5543  | 0.8211 | 0.9413 |
| PWY-5857   | ubiquinol | 0.1253 | 0.5543  | 0.8211 | 0.9413 |
| PWY-6708   | ubiquinol | 0.1253 | 0.5543  | 0.8211 | 0.9413 |
| PWY-6125   | superpath | 0.1229 | 0.4098  | 0.7642 | 0.9413 |
| PWY-6728   | methylasp | 0.1205 | 0.5991  | 0.8405 | 0.9413 |
| PWY0-845   | superpath | 0.1199 | 0.5765  | 0.8352 | 0.9413 |
| PWY-7228   | superpath | 0.1195 | 0.4264  | 0.7793 | 0.9413 |
| PWY-7400   | L-arginin | 0.1135 | 0.2873  | 0.6929 | 0.9163 |
| ARGSYN-PWL | arginin   | 0.1129 | 0.2882  | 0.6951 | 0.9163 |
| DENOVOPUR  | superpath | 0.1128 | 0.3624  | 0.7555 | 0.9402 |
| PWY-5659   | GDP-mannc | 0.1115 | 0.2962  | 0.7066 | 0.9163 |
| PWY-6151   | S-adenosy | 0.1089 | 0.2909  | 0.708  | 0.9163 |
| P124-PWY   | Bifidobac | 0.1049 | 0.4452  | 0.8137 | 0.9413 |
| GALLATE-E  | gallate d | 0.1042 | 0.08108 | 0.1988 | 0.8498 |
| PWY-5188   | tetrapyrr | 0.1027 | 0.2945  | 0.7273 | 0.932  |
| P184-PWY   | protocate | 0.1021 | 0.06357 | 0.1081 | 0.8498 |

|            |           |          |          |        |        |
|------------|-----------|----------|----------|--------|--------|
| PWY-1361   | benzoyl-C | 0.09993  | 0.06463  | 0.1221 | 0.8498 |
| PWY4FS-7   | phosphati | 0.09965  | 0.2972   | 0.7374 | 0.9326 |
| PWY4FS-8   | phosphati | 0.09965  | 0.2972   | 0.7374 | 0.9326 |
| PWY-5860   | superpath | 0.09688  | 1.073    | 0.928  | 0.9842 |
| PWY-5862   | superpath | 0.09688  | 1.073    | 0.928  | 0.9842 |
| GLYCOLYSI  | glycolysi | 0.0965   | 0.286    | 0.7358 | 0.9326 |
| PWY-5845   | superpath | 0.09626  | 1.069    | 0.9283 | 0.9842 |
| PWY-5850   | superpath | 0.09626  | 1.069    | 0.9283 | 0.9842 |
| PWY-5896   | superpath | 0.09626  | 1.069    | 0.9283 | 0.9842 |
| PWY-7200   | superpath | 0.09535  | 0.3439   | 0.7816 | 0.9413 |
| PWY-7197   | pyrimidin | 0.08998  | 0.4305   | 0.8344 | 0.9413 |
| PWY-6609   | adenine a | 0.08653  | 0.3054   | 0.7769 | 0.9413 |
| PWY-7184   | pyrimidin | 0.07929  | 0.3702   | 0.8304 | 0.9413 |
| P122-PWY   | heterolac | 0.0707   | 0.365    | 0.8464 | 0.9413 |
| PWY0-166   | superpath | 0.07061  | 0.2988   | 0.8132 | 0.9413 |
| PWY-6317   | galactose | 0.07     | 0.2692   | 0.7949 | 0.9413 |
| PWY-5189   | tetrapyrr | 0.06992  | 0.3002   | 0.8158 | 0.9413 |
| PWY-7187   | pyrimidin | 0.0671   | 0.2962   | 0.8208 | 0.9413 |
| ANAEROFRU  | homolacti | 0.06427  | 0.2982   | 0.8294 | 0.9413 |
| OANTIGEN-0 | -antigen  | 0.04539  | 0.3028   | 0.8808 | 0.9657 |
| PWY-5484   | glycolysi | 0.03752  | 0.3293   | 0.9093 | 0.9829 |
| CRNFORCAT  | creatinin | 0.03406  | 0.1747   | 0.8455 | 0.9413 |
| PWY-6581   | spirillox | 0.03147  | 0.02641  | 0.2334 | 0.8498 |
| PWY0-12773 | -phenylp  | 0.0312   | 0.02799  | 0.2651 | 0.8498 |
| POLYAMINS  | superpath | 0.02557  | 0.4764   | 0.9572 | 1      |
| P281-PWY   | 3-phenylp | 0.02232  | 0.9268   | 0.9808 | 1      |
| PWY-5183   | superpath | 0.02071  | 0.06137  | 0.7357 | 0.9326 |
| PWY-1422   | vitamin E | 0.01885  | 0.01606  | 0.2407 | 0.8498 |
| SUCSYN-PW  | sucrose t | 0.01822  | 0.8511   | 0.9829 | 1      |
| GALLATE-Γ  | gallate d | 0.01573  | 0.07109  | 0.8249 | 0.9413 |
| VALDEG-PWL | -valine   | 0.01343  | 0.03347  | 0.6881 | 0.9163 |
| PWY-6713   | L-rhamnos | 0.009946 | 0.01165  | 0.3931 | 0.8498 |
| PWY-5198   | factor 42 | 0.008837 | 0.02202  | 0.6882 | 0.9163 |
| HCAMHPDEG3 | -phenylp  | 0.008317 | 0.007465 | 0.2652 | 0.8498 |
| PWY-6690   | cinnamate | 0.008317 | 0.007465 | 0.2652 | 0.8498 |
| AEROBACTI  | aerobacti | 0.005019 | 0.003948 | 0.2037 | 0.8498 |
| P164-PWY   | purine nu | 0.003879 | 0.415    | 0.9925 | 1      |
| GLCMANNAN  | superpath | 0.002679 | 0.3278   | 0.9935 | 1      |
| PWY0-1298  | superpath | 0.00081  | 0.3318   | 0.9981 | 1      |
| P621-PWY   | nylon-6 c | 0        | 0.000155 | 1      | 1      |
| PWY-5532   | adenosine | 0        | 0.000155 | 1      | 1      |
| PWY-5941   | glycogen  | 0        | 0.000155 | 1      | 1      |
| PWY-6165   | chorismat | 0        | 0.000155 | 1      | 1      |
| PWY-6174   | mevalonat | 0        | 0.000155 | 1      | 1      |
| PWY-6338   | superpath | 0        | 0.000155 | 1      | 1      |
| PWY-6565   | superpath | 0        | 0.000155 | 1      | 1      |
| PWY-6731   | starch de | 0        | 0.000155 | 1      | 1      |
| PWY-6992   | 1,5-anhyd | 0        | 0.000155 | 1      | 1      |
| PWY-7097   | vanillin  | 0        | 0.000155 | 1      | 1      |
| PWY-7098   | vanillin  | 0        | 0.000155 | 1      | 1      |
| PWY-7185   | UTP and C | 0        | 0.000155 | 1      | 1      |



|                    |          |          |        |        |
|--------------------|----------|----------|--------|--------|
| PWY-7391 isoprene  | 0        | 0.000155 | 1      | 1      |
| PWY-6107 chlorosal | -0.00208 | 0.97     | 0.9983 | 1      |
| PWY-7031 protein N | -0.00806 | 0.0306   | 0.7923 | 0.9413 |
| ARGDEG-PWsuperpath | -0.01179 | 0.09892  | 0.9051 | 0.9812 |
| ORNARGDEGsuperpath | -0.01179 | 0.09892  | 0.9051 | 0.9812 |
| PWY-6948 sitosterc | -0.01735 | 0.02281  | 0.4468 | 0.8498 |
| PWY-7255 ergothion | -0.02426 | 0.04651  | 0.602  | 0.8606 |
| PWY0-1297superpath | -0.02775 | 0.3549   | 0.9377 | 0.9888 |
| PWY0-1296purine ri | -0.03099 | 0.3662   | 0.9325 | 0.9861 |
| UDPNAGSYNUDP-N-ace | -0.03657 | 0.3915   | 0.9256 | 0.9842 |
| PWY-621 sucrose d  | -0.04837 | 0.3223   | 0.8807 | 0.9657 |
| PWY-6891 thiazole  | -0.04901 | 0.5353   | 0.927  | 0.9842 |
| PWY-6901 superpath | -0.05678 | 0.2844   | 0.8417 | 0.9413 |
| P161-PWY acetylene | -0.0702  | 0.3765   | 0.8521 | 0.9449 |
| ARG+POLYASuperpath | -0.07036 | 0.3961   | 0.859  | 0.9498 |
| RHAMCAT-FL-rhamnos | -0.08677 | 0.3142   | 0.7824 | 0.9413 |
| PWY-181 photoresp  | -0.09026 | 0.6718   | 0.8931 | 0.9736 |
| PENTOSE-Fpentose p | -0.09543 | 0.3464   | 0.783  | 0.9413 |
| P23-PWY reductive  | -0.09596 | 0.2973   | 0.7469 | 0.9366 |
| PWY-7431 aromatic  | -0.1016  | 0.5058   | 0.8408 | 0.9413 |
| LIPASYN-Fphospholi | -0.1063  | 0.1184   | 0.3693 | 0.8498 |
| PWY-3661 glycine b | -0.1092  | 0.1796   | 0.5429 | 0.8498 |
| PWY-7456 mannan de | -0.1112  | 0.3484   | 0.7497 | 0.9366 |
| PWY-5918 superpath | -0.117   | 0.3028   | 0.6993 | 0.9163 |
| PWY-5913 TCA cycle | -0.118   | 0.4007   | 0.7684 | 0.9413 |
| PWY0-1415superpath | -0.1241  | 0.4956   | 0.8023 | 0.9413 |
| HEME-BIOSheme bios | -0.1638  | 0.3398   | 0.6299 | 0.8769 |
| PWY-6404 superpath | -0.1643  | 0.216    | 0.4468 | 0.8498 |
| PWY-7211 superpath | -0.1651  | 0.4299   | 0.701  | 0.9163 |
| PWY-1541 superpath | -0.1717  | 0.8626   | 0.8422 | 0.9413 |
| PWY-5347 superpath | -0.1833  | 0.2979   | 0.5383 | 0.8498 |
| PWY-7003 glycerol  | -0.1895  | 0.7808   | 0.8083 | 0.9413 |
| ARGORNPRCarginine, | -0.1905  | 0.5986   | 0.7502 | 0.9366 |
| HSERMETANL-methion | -0.2091  | 0.3555   | 0.5565 | 0.8498 |
| PWY-5384 sucrose d | -0.2341  | 0.658    | 0.7221 | 0.9284 |
| MET-SAM-Fsuperpath | -0.2378  | 0.3235   | 0.4623 | 0.8498 |
| POLYAMSYNsuperpath | -0.2531  | 0.499    | 0.612  | 0.8676 |
| HOMOSER-ML-methion | -0.2589  | 0.3369   | 0.4422 | 0.8498 |
| PWY0-1261anhydromu | -0.2726  | 0.4731   | 0.5646 | 0.8498 |
| CODH-PWY reductive | -0.294   | 0.6413   | 0.6466 | 0.8928 |
| PWY-7295 L-arabinc | -0.3071  | 0.2108   | 0.1452 | 0.8498 |
| DENITRIFInitrate r | -0.3076  | 0.5976   | 0.6067 | 0.8632 |
| HEXITOLDEsuperpath | -0.3218  | 0.4496   | 0.4741 | 0.8498 |
| PWY-5022 4-aminobu | -0.3384  | 0.7021   | 0.6299 | 0.8769 |
| PWY0-781 aspartate | -0.3449  | 0.3812   | 0.3656 | 0.8498 |
| PWY-5180 toluene d | -0.3475  | 0.781    | 0.6564 | 0.8945 |
| PWY-5182 toluene d | -0.3475  | 0.781    | 0.6564 | 0.8945 |
| TEICHOICATEichoic  | -0.3485  | 0.4304   | 0.4181 | 0.8498 |
| P4-PWY superpath   | -0.3525  | 0.3735   | 0.3452 | 0.8498 |
| ENTBACSYNEnterobac | -0.3782  | 0.7517   | 0.6149 | 0.8685 |
| THREOCAT-superpath | -0.3788  | 0.7188   | 0.5982 | 0.8606 |

|            |            |         |        |         |        |
|------------|------------|---------|--------|---------|--------|
| PWY-7377   | cob(II)yr  | -0.4135 | 0.737  | 0.5747  | 0.8498 |
| PRPP-PWY   | superpath  | -0.4349 | 0.4018 | 0.279   | 0.8498 |
| PWY-4984   | urea cycl  | -0.4503 | 0.5893 | 0.4448  | 0.8498 |
| PWY-5415   | catechol   | -0.4887 | 0.9387 | 0.6026  | 0.8606 |
| PWY-5005   | biotin bi  | -0.5002 | 0.8929 | 0.5753  | 0.8498 |
| PWY0-1479  | tRNA proc  | -0.5257 | 0.4702 | 0.2635  | 0.8498 |
| PWY-6630   | superpath  | -0.5348 | 0.6143 | 0.384   | 0.8498 |
| PWY-6628   | superpath  | -0.5489 | 0.6186 | 0.3749  | 0.8498 |
| PWY-6071   | superpath  | -0.5599 | 0.6298 | 0.3741  | 0.8498 |
| PWY-3781   | aerobic r  | -0.5604 | 0.3177 | 0.07771 | 0.8354 |
| HEMESYN2   | -heme bios | -0.563  | 0.327  | 0.08513 | 0.8498 |
| PWY-2941   | L-lysine   | -0.5832 | 0.6498 | 0.3695  | 0.8498 |
| P125-PWY   | superpath  | -0.5882 | 0.7764 | 0.4487  | 0.8498 |
| P461-PWY   | hexitol f  | -0.5934 | 0.5553 | 0.2852  | 0.8498 |
| RUMP-PWY   | formaldehy | -0.6047 | 0.5835 | 0.3001  | 0.8498 |
| PWY-5747   | 2-methylc  | -0.6091 | 0.5715 | 0.2865  | 0.8498 |
| GLYCOLYSIS | superpath  | -0.6141 | 0.4254 | 0.1488  | 0.8498 |
| GLYOXYLAT  | glyoxylat  | -0.6288 | 0.5377 | 0.2422  | 0.8498 |
| GLUCOSE1P  | glucose a  | -0.6412 | 0.655  | 0.3276  | 0.8498 |
| PWY-5920   | superpath  | -0.6659 | 0.622  | 0.2844  | 0.8498 |
| PWY-5345   | superpath  | -0.6661 | 0.3711 | 0.07268 | 0.8273 |
| PWY-1861   | formaldehy | -0.6907 | 0.6768 | 0.3074  | 0.8498 |
| TCA-GLYOX  | superpath  | -0.7041 | 0.4543 | 0.1212  | 0.8498 |
| PWY0-42    | 2-methylc  | -0.7084 | 0.5598 | 0.2058  | 0.8498 |
| PWY-6397   | mycolyl-a  | -0.7121 | 1.04   | 0.4935  | 0.8498 |
| PWY-7392   | taxadiene  | -0.7795 | 0.6187 | 0.2077  | 0.8498 |
| AST-PWY    | L-arginin  | -0.7824 | 0.6924 | 0.2585  | 0.8498 |
| PWY-5507   | adenosylc  | -0.8311 | 0.8048 | 0.3017  | 0.8498 |
| PWY-6396   | superpath  | -0.8385 | 0.9918 | 0.3979  | 0.8498 |
| PWY-7527   | L-methion  | -0.8794 | 0.938  | 0.3485  | 0.8498 |
| PWY-4361   | S-methyl-  | -0.9004 | 0.9619 | 0.3492  | 0.8498 |
| P105-PWY   | TCA cycle  | -0.936  | 0.8219 | 0.2548  | 0.8498 |
| P381-PWY   | adenosylc  | -0.9504 | 0.758  | 0.2099  | 0.8498 |
| P101-PWY   | ectoine b  | -0.9583 | 0.9638 | 0.3201  | 0.8498 |
| PWY490-3   | nitrate r  | -0.962  | 0.8065 | 0.233   | 0.8498 |
| PWY-7376   | cob(II)yr  | -0.963  | 0.7652 | 0.2082  | 0.8498 |
| PWY-7234   | inosine-5  | -0.9656 | 0.8259 | 0.2423  | 0.8498 |
| PWY-5417   | catechol   | -0.9901 | 0.7736 | 0.2006  | 0.8498 |
| PWY-5431   | aromatic   | -0.9901 | 0.7736 | 0.2006  | 0.8498 |
| PWY-5178   | toluene d  | -0.9919 | NaN    | NaN     | NaN    |
| PWY-5838   | superpath  | -1.01   | 1.022  | 0.323   | 0.8498 |
| PWY-6906   | chitin de  | -1.018  | 0.7487 | 0.1739  | 0.8498 |
| PWY-5840   | superpath  | -1.021  | 1.027  | 0.3203  | 0.8498 |
| LEU-DEG2   | -L-leucine | -1.025  | 0.7299 | 0.1601  | 0.8498 |
| PWY-5861   | superpath  | -1.031  | 1.034  | 0.3187  | 0.8498 |
| PWY-5897   | superpath  | -1.032  | 1.033  | 0.318   | 0.8498 |
| PWY-5898   | superpath  | -1.032  | 1.033  | 0.318   | 0.8498 |
| PWY-5899   | superpath  | -1.032  | 1.033  | 0.318   | 0.8498 |
| PWY-6182   | superpath  | -1.065  | 0.631  | 0.09147 | 0.8498 |
| PWY0-321   | phenylace  | -1.08   | 0.555  | 0.05177 | 0.6401 |
| PWY-5863   | superpath  | -1.098  | 1.072  | 0.3058  | 0.8498 |

|              |           |        |        |          |          |
|--------------|-----------|--------|--------|----------|----------|
| PWY-5837     | 1,4-dihyd | -1.1   | 1.073  | 0.3054   | 0.8498   |
| PWY-7094     | fatty aci | -1.124 | 0.7127 | 0.1146   | 0.8498   |
| PWY-5910     | superpath | -1.178 | 0.9935 | 0.2356   | 0.8498   |
| PWY-922      | mevalonat | -1.186 | 1.001  | 0.236    | 0.8498   |
| PWY-722      | nicotinat | -1.301 | 1.02   | 0.2022   | 0.8498   |
| PROTCATE     | protocate | -1.328 | 1.063  | 0.2117   | 0.8498   |
| TYRFUMCATL   | -tyrosin  | -1.351 | 0.4857 | 0.005393 | 0.1897   |
| PWY-5420     | catechol  | -1.368 | 1.125  | 0.2241   | 0.8498   |
| CATECHOL     | -catechol | -1.381 | 1.104  | 0.2108   | 0.8498   |
| PWY-5419     | catechol  | -1.483 | 1.202  | 0.2171   | 0.8498   |
| PWY-6470     | peptidogl | -1.486 | 1.125  | 0.1866   | 0.8498   |
| P221-PWY     | octane ox | -1.55  | 0.968  | 0.1093   | 0.8498   |
| PWY-6210     | 2-aminoph | -1.556 | 1.004  | 0.1212   | 0.8498   |
| PWY-6562     | norspermi | -1.594 | 0.5936 | 0.007241 | 0.2      |
| PWY-5655     | L-tryptop | -1.629 | 0.8729 | 0.06198  | 0.7269   |
| PWY-5028     | L-histidi | -1.682 | 0.3994 | 2.55E-05 | 0.009858 |
| GOLPDLCAI    | superpath | -1.777 | NaN    | NaN      | NaN      |
| PWY-5181     | toluene d | -1.825 | 0.576  | 0.001531 | 0.1173   |
| PWY-6185     | 4-methylc | -1.858 | 0.6136 | 0.002455 | 0.1188   |
| PWY-6876     | isopropan | -1.903 | 1.349  | 0.1584   | 0.8498   |
| DHGLUCONA    | glucose d | -2.029 | 0.8878 | 0.02231  | 0.4317   |
| PWY-5654     | 2-amino-3 | -2.065 | 0.7241 | 0.004337 | 0.1678   |
| LACTOSECA    | lactose a | -2.077 | 0.9399 | 0.02712  | 0.4771   |
| PWY-7616     | methanol  | -2.167 | 0.5769 | 0.000172 | 0.02222  |
| PWY-5647     | 2-nitrobe | -2.173 | 0.7893 | 0.005894 | 0.1901   |
| PWY-5265     | peptidogl | -2.207 | 0.9468 | 0.01973  | 0.4019   |
| NADSYN-PWNAD | biosy     | -2.271 | 0.739  | 0.00212  | 0.1173   |
| PWY-5651     | L-tryptop | -2.273 | 0.7398 | 0.002122 | 0.1173   |
| PWY-6505     | L-tryptop | -2.299 | 0.7995 | 0.004031 | 0.1678   |
| PWY-5430     | meta clea | -2.369 | 0.6573 | 0.000313 | 0.03025  |
| PWY-6383     | mono-tran | -2.629 | 1.023  | 0.01017  | 0.2315   |
| PWY1G-0      | mycothiol | -2.66  | 1.031  | 0.009894 | 0.2315   |
| PWY-7007     | methyl ke | -3.268 | 0.8135 | 5.88E-05 | 0.01137  |

phylum

| ID        | M1       | M2       | M3       | M4       | M5       | M6       | M8       | K1       |
|-----------|----------|----------|----------|----------|----------|----------|----------|----------|
| Bacteroid | 0.264676 | 0.171506 | 0.483209 | 0.067191 | 0.663354 | 0.432761 | 0.606864 | 0.837383 |
| Firmicute | 0.501191 | 0.598783 | 0.411019 | 0.824274 | 0.310895 | 0.504274 | 0.327246 | 0.146686 |
| Actinobac | 0.212254 | 0.208607 | 0.054489 | 0.097563 | 0.005951 | 0.02872  | 0.03577  | 0.000445 |
| Proteobac | 0.008611 | 0.009846 | 0.034942 | 0.004699 | 0.009158 | 0.019914 | 0.017454 | 0.006377 |
| Tenericut | 0.001596 | 0.000804 | 0.006629 | 0.000796 | 0.001224 | 0.001381 | 0.000445 | 0.000127 |
| Elusimicr | 0.000314 | 0.000913 | 0.00102  |          | 0.000779 | 0.002245 | 0.000139 | 0.000508 |
| Cyanobact | 0.000105 | 0.000435 | 0.001505 | 0.000136 | 0.000371 | 0.000288 | 0.001615 | 0.002224 |
| TM7       | 0.000157 | 0.002304 | 0.000146 | 0.001476 | 0.000148 | 0.000345 | 0.000139 | 0        |
| Spirochae | 0        | 0        | 0        | 0        | 0.000204 | 8.63E-05 | 5.57E-05 | 0        |
| Deferriba | 0        | 0        | 4.86E-05 | 5.83E-05 | 0        | 0        | 0        | 8.47E-05 |
| Others    | 0.011097 | 0.006803 | 0.006993 | 0.003806 | 0.007916 | 0.009986 | 0.010272 | 0.006165 |

| K2       | K3       | K4       | K5       | K6       | K7       | DX1      | DX2      | DX3      |
|----------|----------|----------|----------|----------|----------|----------|----------|----------|
| 0.562139 | 0.809646 | 0.841511 | 0.583007 | 0.419274 | 0.213321 | 0.789078 | 0.716719 | 0.63663  |
| 0.412749 | 0.173867 | 0.144293 | 0.391778 | 0.544893 | 0.75139  | 0.182471 | 0.259771 | 0.343202 |
| 0.00054  | 0.000744 | 0.00034  | 0.001022 | 0.002876 | 0.00226  | 0.001468 | 0.008845 | 0.004273 |
| 0.009698 | 0.007974 | 0.005716 | 0.011735 | 0.023125 | 0.022931 | 0.016995 | 0.005843 | 0.01159  |
| 0.007336 | 7.69E-05 | 4.25E-05 | 0.003364 | 0.002389 | 0.001818 | 0.000133 | 0.000159 | 0.000353 |
| 0.00189  | 0.000462 | 0.000723 | 0.000972 | 0.003786 | 0.002136 | 0.000133 | 0.001432 | 0.000269 |
| 0.00153  | 0.001103 | 0.001105 | 0.003314 | 0.000683 | 0.001642 | 0.000289 | 0.000523 | 0.000521 |
| 0.000743 | 0.000282 | 0        | 0.000174 | 0.000845 | 0.001095 | 0        | 0.000159 | 0.000353 |
| 0.000158 | 0        | 0        | 0        | 0        | 0.000918 | 8.90E-05 | 6.82E-05 | 8.41E-05 |
| 0        | 5.13E-05 | 0        | 7.48E-05 | 0        | 0.000194 | 0        | 0.000136 | 0        |
| 0.003218 | 0.005795 | 0.006269 | 0.00456  | 0.002129 | 0.002295 | 0.009343 | 0.006344 | 0.002725 |

| DX4      | DX5      | DX6      | DX7      | G1       | G3       | G4       | G5       | G6       |
|----------|----------|----------|----------|----------|----------|----------|----------|----------|
| 0.391609 | 0.4619   | 0.634294 | 0.559292 | 0.220357 | 0.420308 | 0.620673 | 0.659924 | 0.497115 |
| 0.577082 | 0.51053  | 0.331581 | 0.409689 | 0.753944 | 0.555591 | 0.36337  | 0.32826  | 0.479468 |
| 0.004062 | 0.004761 | 0.008784 | 0.006449 | 0.002822 | 0.000941 | 0.002391 | 0.000249 | 0.001785 |
| 0.015203 | 0.015708 | 0.016619 | 0.015856 | 0.017215 | 0.013896 | 0.005977 | 0.007093 | 0.005788 |
| 0.001169 | 0.000814 | 0.000268 | 0.000388 | 0.000586 | 0.000897 | 0.002572 | 0.00065  | 0.008514 |
| 0.004698 | 0.002747 | 0.000907 | 0.000388 | 0.000781 | 0.000159 | 0.001503 | 0.000134 | 0.002932 |
| 0.001477 | 0.000733 | 0.000557 | 0.001551 | 0.001473 | 0.006716 | 0.001612 | 0.001052 | 0.000526 |
| 0.000616 | 0.000244 | 0.000351 | 0.000327 | 0.001597 | 0.000492 | 0.000254 | 0.000249 | 0.000545 |
| 0.000164 | 0        | 0.000309 | 0.000122 | 0        | 0        | 0        | 0        | 0        |
| 8.21E-05 | 0        | 0        | 0        | 3.55E-05 | 0        | 5.43E-05 | 0        | 7.52E-05 |
| 0.003837 | 0.002564 | 0.00633  | 0.005938 | 0.001189 | 0.000999 | 0.001594 | 0.00239  | 0.003251 |

| G7       | G8       | Z1       | Z2       | Z3       | Z4       | Z5       | Z6       | Z7       |
|----------|----------|----------|----------|----------|----------|----------|----------|----------|
| 0.411646 | 0.452242 | 0.210225 | 0.630139 | 0.769513 | 0.427727 | 0.359414 | 0.275222 | 0.387636 |
| 0.567602 | 0.507427 | 0.75925  | 0.35391  | 0.216358 | 0.558682 | 0.606222 | 0.683792 | 0.601902 |
| 0.003245 | 0.004416 | 0.004332 | 0.001791 | 0.000482 | 0.000553 | 0.01174  | 0.000725 | 0.000949 |
| 0.009218 | 0.029183 | 0.019132 | 0.007204 | 0.008624 | 0.009295 | 0.015286 | 0.030637 | 0.004167 |
| 0.002596 | 0.002402 | 0.001354 | 0.00021  | 0.00039  | 0.000957 | 0.000367 | 0.001156 | 0.000703 |
| 0.000973 | 0.000508 | 0.001827 | 0.002497 | 0.000528 | 0.000255 | 0.002519 | 0.000804 | 0.00116  |
| 0.000708 | 0.000406 | 0.00018  | 0.000648 | 0.001307 | 0.000468 | 0.000122 | 0.002097 | 0.000826 |
| 0.001224 | 0.001489 | 0.000835 | 0.000114 | 0.000138 | 0.000468 | 0.000587 | 0.000686 | 0.001037 |
| 0.000206 | 0        | 0.000158 | 5.72E-05 | 4.59E-05 | 0        | 0        | 0.001764 | 0        |
| 0        | 0        | 6.77E-05 | 0        | 0        | 0        | 0        | 0.001215 | 0        |
| 0.002581 | 0.001929 | 0.00264  | 0.00343  | 0.002615 | 0.001595 | 0.003742 | 0.001901 | 0.001618 |

| D1       | D2       | D3       | D4       | D5       | D6       | D7       |
|----------|----------|----------|----------|----------|----------|----------|
| 0.735779 | 0.592705 | 0.551915 | 0.199381 | 0.563919 | 0.586654 | 0.243422 |
| 0.241535 | 0.351887 | 0.421368 | 0.762619 | 0.404931 | 0.385629 | 0.720489 |
| 0.003368 | 0.020551 | 0.003739 | 0.001487 | 0.002846 | 0.000448 | 0.010179 |
| 0.006712 | 0.021289 | 0.015163 | 0.014657 | 0.021951 | 0.013032 | 0.015565 |
| 0.004164 | 0.008008 | 0.001168 | 0.008469 | 0.002091 | 0        | 0.002729 |
| 0.001115 | 0.000936 | 0.00013  | 0.007497 | 0.000692 | 0.007987 | 0.00083  |
| 0.001274 | 0.001206 | 0.001039 | 0.001091 | 0.00206  | 0.002746 | 0.000593 |
| 0.00025  | 0.000828 | 0.001013 | 0.001765 | 0.000142 | 0.000252 | 0.000522 |
| 6.83E-05 | 0        | 0.000182 | 0.000317 | 0        | 0        | 0.000166 |
| 0        | 7.20E-05 | 0        | 0.000337 | 0.000236 | 0        | 7.12E-05 |
| 0.005734 | 0.002519 | 0.004284 | 0.00238  | 0.001132 | 0.003251 | 0.005434 |



GABA

|   | 1     | 2     | 3     | 4     | 5     | 6     | 7     |  |  |  |     |
|---|-------|-------|-------|-------|-------|-------|-------|--|--|--|-----|
| A | 0.03  | 0.37  | 0.275 | 0.293 | 0.331 | 0.399 | 0.402 |  |  |  | 450 |
| B | 0.586 | 0.381 | 0.269 | 0.328 | 0.351 | 0.394 | 0.393 |  |  |  | 450 |
| C | 0.361 | 0.355 | 0.275 | 0.283 | 0.294 | 0.369 | 0.385 |  |  |  | 450 |
| D | 0.22  | 0.358 | 0.303 | 0.319 | 0.322 | 0.394 | 0.433 |  |  |  | 450 |
| E | 0.166 | 0.365 | 0.28  | 0.312 | 0.34  | 0.411 | 0.468 |  |  |  | 450 |
| F | 0.143 | 0.369 | 0.282 | 0.354 | 0.352 | 0.404 | 0.385 |  |  |  | 450 |
| G |       | 0.358 | 0.3   | 0.344 | 0.32  | 0.375 | 0.377 |  |  |  | 450 |
| H |       | 0.358 | 0.296 | 0.34  | 0.345 | 0.358 | 0.384 |  |  |  | 450 |

|   | 1     | 2     | 3     | 4     | 5     | 6     | 7     |
|---|-------|-------|-------|-------|-------|-------|-------|
| A | 0     | 0.34  | 0.245 | 0.263 | 0.301 | 0.369 | 0.372 |
| B | 0.556 | 0.351 | 0.239 | 0.298 | 0.321 | 0.364 | 0.363 |
| C | 0.331 | 0.325 | 0.245 | 0.253 | 0.264 | 0.339 | 0.355 |
| D | 0.19  | 0.328 | 0.273 | 0.289 | 0.292 | 0.364 | 0.403 |
| E | 0.136 | 0.335 | 0.25  | 0.282 | 0.31  | 0.381 | 0.438 |
| F | 0.113 | 0.339 | 0.252 | 0.324 | 0.322 | 0.374 | 0.355 |
| G |       | 0.328 | 0.27  | 0.314 | 0.29  | 0.345 | 0.347 |
| H |       | 0.328 | 0.266 | 0.31  | 0.315 | 0.328 | 0.354 |

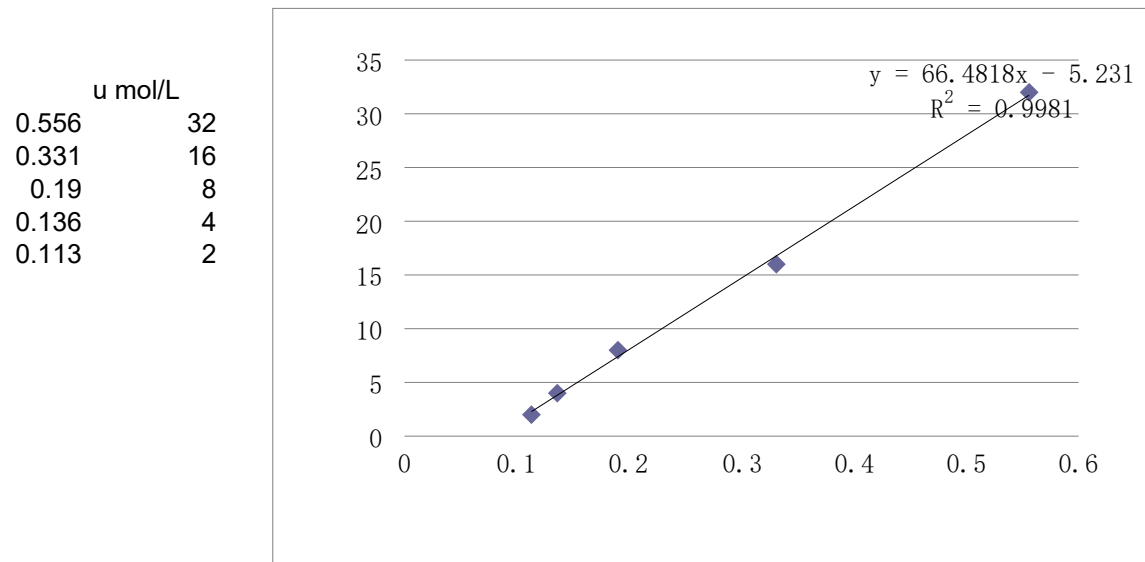

| Concentrations | K     | M     | DX    | D     | Z     | G     |
|----------------|-------|-------|-------|-------|-------|-------|
| A              | 17.37 | 11.06 | 12.25 | 14.78 | 19.30 | 19.50 |
| B              | 18.10 | 10.66 | 14.58 | 16.11 | 18.97 | 18.90 |
| C              | 16.38 | 11.06 | 11.59 | 12.32 | 17.31 | 18.37 |
| D              | 16.57 | 12.92 | 13.98 | 14.18 | 18.97 | 21.56 |
| E              | 17.04 | 11.39 | 13.52 | 15.38 | 20.10 | 23.89 |
| F              | 17.31 | 11.52 | 16.31 | 16.18 | 19.63 | 18.37 |
| G              | 16.57 | 12.72 | 15.64 | 14.05 | 17.70 | 17.84 |
| H              | 16.57 | 12.45 | 15.38 | 15.71 | 16.57 | 18.30 |

|            | K     | M     | DX    | D     | Z     | G     |
|------------|-------|-------|-------|-------|-------|-------|
| mean value | 16.99 | 11.72 | 14.16 | 14.84 | 18.57 | 19.59 |

|            |      |      |      |      |      |      |
|------------|------|------|------|------|------|------|
| standard d | 0.55 | 0.80 | 1.55 | 1.22 | 1.15 | 1.95 |
|------------|------|------|------|------|------|------|

GAD65

|   | 1     | 2     | 3     | 4     | 6     | 7     | 8     |  |  |  |     |
|---|-------|-------|-------|-------|-------|-------|-------|--|--|--|-----|
| A | 0.032 | 0.438 | 0.354 | 0.424 | 0.372 | 0.405 | 0.45  |  |  |  | 450 |
| B | 0.567 | 0.414 | 0.328 | 0.419 | 0.343 | 0.393 | 0.426 |  |  |  | 450 |
| C | 0.417 | 0.446 | 0.366 | 0.384 | 0.35  | 0.38  | 0.408 |  |  |  | 450 |
| D | 0.225 | 0.445 | 0.363 | 0.411 | 0.374 | 0.392 | 0.443 |  |  |  | 450 |
| E | 0.161 | 0.429 | 0.376 | 0.429 | 0.297 | 0.393 | 0.436 |  |  |  | 450 |
| F | 0.121 | 0.448 | 0.387 | 0.419 | 0.323 | 0.405 | 0.438 |  |  |  | 450 |
| G |       | 0.426 | 0.377 | 0.453 | 0.342 | 0.399 | 0.421 |  |  |  | 450 |
| H |       | 0.419 | 0.36  | 0.514 | 0.362 | 0.396 | 0.422 |  |  |  | 450 |

|   | 1     | 2     | 3     | 4     | 6     | 7     | 8     |
|---|-------|-------|-------|-------|-------|-------|-------|
| A | 0     | 0.406 | 0.322 | 0.392 | 0.34  | 0.373 | 0.418 |
| B | 0.535 | 0.382 | 0.296 | 0.387 | 0.311 | 0.361 | 0.394 |
| C | 0.385 | 0.414 | 0.334 | 0.352 | 0.318 | 0.348 | 0.376 |
| D | 0.193 | 0.413 | 0.331 | 0.379 | 0.342 | 0.36  | 0.411 |
| E | 0.129 | 0.397 | 0.344 | 0.397 | 0.265 | 0.361 | 0.404 |
| F | 0.089 | 0.416 | 0.355 | 0.387 | 0.291 | 0.373 | 0.406 |
| G |       | 0.394 | 0.345 | 0.421 | 0.31  | 0.367 | 0.389 |
| H |       | 0.387 | 0.328 | 0.482 | 0.33  | 0.364 | 0.39  |

ng/ml  
 0.535 2  
 0.385 1  
 0.193 0.5  
 0.129 0.25  
 0.089 0.125

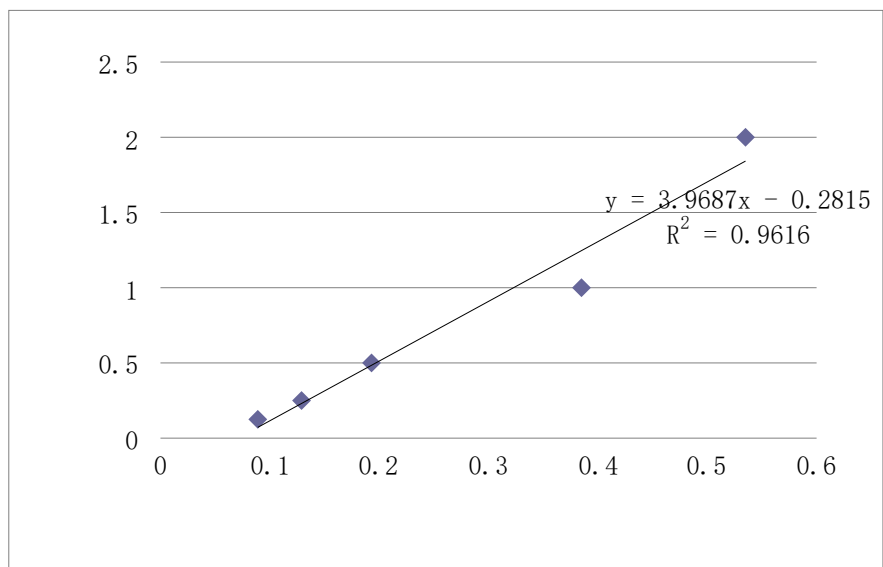

| Concentrations | 1 | 2    | 3    | 4    | 6    | 7    | 8    |
|----------------|---|------|------|------|------|------|------|
| A              |   | 1.33 | 1.00 | 1.27 | 1.07 | 1.20 | 1.38 |
| B              |   | 1.23 | 0.89 | 1.25 | 0.95 | 1.15 | 1.28 |
| C              |   | 1.36 | 1.04 | 1.12 | 0.98 | 1.10 | 1.21 |
| D              |   | 1.36 | 1.03 | 1.22 | 1.08 | 1.15 | 1.35 |
| E              |   | 1.29 | 1.08 | 1.29 | 0.77 | 1.15 | 1.32 |
| F              |   | 1.37 | 1.13 | 1.25 | 0.87 | 1.20 | 1.33 |
| G              |   | 1.28 | 1.09 | 1.39 | 0.95 | 1.18 | 1.26 |
| H              |   | 1.25 | 1.02 | 1.63 | 1.03 | 1.16 | 1.27 |

mean value      K      M      DX      D      Z      G

1.31      1.04      1.30      0.96      1.16      1.30

|            |      |      |      |      |      |      |
|------------|------|------|------|------|------|------|
| standard d | 0.05 | 0.07 | 0.14 | 0.10 | 0.03 | 0.05 |
|------------|------|------|------|------|------|------|

Gln

|   | 1     | 2     | 3     | 4     | 5     | 6     | 7     |  |  |  |     |
|---|-------|-------|-------|-------|-------|-------|-------|--|--|--|-----|
| A | 0.03  | 0.37  | 0.276 | 0.288 | 0.35  | 0.408 | 0.457 |  |  |  | 450 |
| B | 0.504 | 0.364 | 0.261 | 0.284 | 0.41  | 0.431 | 0.415 |  |  |  | 450 |
| C | 0.323 | 0.354 | 0.254 | 0.288 | 0.304 | 0.36  | 0.349 |  |  |  | 450 |
| D | 0.201 | 0.375 | 0.296 | 0.297 | 0.329 | 0.39  | 0.384 |  |  |  | 450 |
| E | 0.146 | 0.369 | 0.274 | 0.313 | 0.328 | 0.407 | 0.394 |  |  |  | 450 |
| F | 0.108 | 0.357 | 0.282 | 0.313 | 0.347 | 0.377 | 0.372 |  |  |  | 450 |
| G |       | 0.351 | 0.275 | 0.311 | 0.316 | 0.367 | 0.42  |  |  |  | 450 |
| H |       | 0.351 | 0.275 | 0.308 | 0.324 | 0.362 | 0.397 |  |  |  | 450 |

|   | 1     | 2     | 3     | 4     | 5     | 6     | 7     |
|---|-------|-------|-------|-------|-------|-------|-------|
| A | 0     | 0.34  | 0.246 | 0.258 | 0.32  | 0.378 | 0.427 |
| B | 0.474 | 0.334 | 0.231 | 0.254 | 0.38  | 0.401 | 0.385 |
| C | 0.293 | 0.324 | 0.224 | 0.258 | 0.274 | 0.33  | 0.319 |
| D | 0.171 | 0.345 | 0.266 | 0.267 | 0.299 | 0.36  | 0.354 |
| E | 0.116 | 0.339 | 0.244 | 0.283 | 0.298 | 0.377 | 0.364 |
| F | 0.078 | 0.327 | 0.252 | 0.283 | 0.317 | 0.347 | 0.342 |
| G |       | 0.321 | 0.245 | 0.281 | 0.286 | 0.337 | 0.39  |
| H |       | 0.321 | 0.245 | 0.278 | 0.294 | 0.332 | 0.367 |

u mol/L  
 0.474 600  
 0.293 300  
 0.171 150  
 0.116 75  
 0.078 37.5

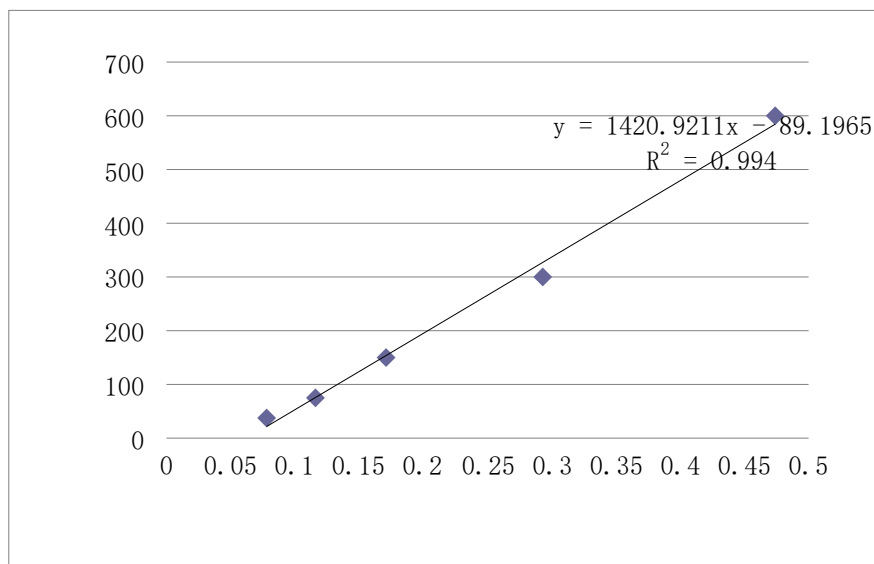

| Concentrations | 1 | 2      | 3      | 4      | 5      | 6      | 7      |
|----------------|---|--------|--------|--------|--------|--------|--------|
| A              |   | 393.61 | 260.13 | 277.17 | 365.21 | 447.57 | 517.15 |
| B              |   | 385.09 | 238.83 | 271.49 | 450.41 | 480.23 | 457.51 |
| C              |   | 370.89 | 228.89 | 277.17 | 299.89 | 379.41 | 363.79 |
| D              |   | 400.71 | 288.53 | 289.95 | 335.39 | 422.01 | 413.49 |
| E              |   | 392.19 | 257.29 | 312.67 | 333.97 | 446.15 | 427.69 |
| F              |   | 375.15 | 268.65 | 312.67 | 360.95 | 403.55 | 396.45 |
| G              |   | 366.63 | 258.71 | 309.83 | 316.93 | 389.35 | 464.61 |
| H              |   | 366.63 | 258.71 | 305.57 | 328.29 | 382.25 | 431.95 |

mean value      K                      M                      DX                      D                      Z                      G

381.36      257.47      294.57      348.88      418.82      434.08

|            |       |       |       |       |       |       |
|------------|-------|-------|-------|-------|-------|-------|
| standard d | 12.44 | 16.82 | 16.46 | 43.26 | 34.18 | 43.60 |
|------------|-------|-------|-------|-------|-------|-------|

Glu

|   | 1     | 2     | 3     | 4     | 5     | 6     | 7     |  |  |  |     |
|---|-------|-------|-------|-------|-------|-------|-------|--|--|--|-----|
| A | 0.029 | 0.334 | 0.518 | 0.458 | 0.449 | 0.445 | 0.423 |  |  |  | 450 |
| B | 0.536 | 0.296 | 0.428 | 0.333 | 0.442 | 0.364 | 0.375 |  |  |  | 450 |
| C | 0.333 | 0.282 | 0.471 | 0.41  | 0.455 | 0.425 | 0.419 |  |  |  | 450 |
| D | 0.185 | 0.276 | 0.461 | 0.42  | 0.461 | 0.418 | 0.386 |  |  |  | 450 |
| E | 0.153 | 0.329 | 0.5   | 0.467 | 0.502 | 0.481 | 0.445 |  |  |  | 450 |
| F | 0.13  | 0.34  | 0.483 | 0.465 | 0.491 | 0.452 | 0.434 |  |  |  | 450 |
| G |       | 0.32  | 0.498 | 0.453 | 0.481 | 0.447 | 0.443 |  |  |  | 450 |
| H |       | 0.324 | 0.512 | 0.49  | 0.479 | 0.438 | 0.459 |  |  |  | 450 |

|   | 1      | 2     | 3     | 4     | 5     | 6     | 7     |
|---|--------|-------|-------|-------|-------|-------|-------|
| A | 0      | 0.305 | 0.489 | 0.429 | 0.42  | 0.416 | 0.394 |
| B | 0.507  | 0.267 | 0.399 | 0.304 | 0.413 | 0.335 | 0.346 |
| C | 0.304  | 0.253 | 0.442 | 0.381 | 0.426 | 0.396 | 0.39  |
| D | 0.156  | 0.247 | 0.432 | 0.391 | 0.432 | 0.389 | 0.357 |
| E | 0.124  | 0.3   | 0.471 | 0.438 | 0.473 | 0.452 | 0.416 |
| F | 0.101  | 0.311 | 0.454 | 0.436 | 0.462 | 0.423 | 0.405 |
| G | -0.029 | 0.291 | 0.469 | 0.424 | 0.452 | 0.418 | 0.414 |
| H | -0.029 | 0.295 | 0.483 | 0.461 | 0.45  | 0.409 | 0.43  |

u mol/L

|       |      |
|-------|------|
| 0.507 | 12   |
| 0.304 | 6    |
| 0.156 | 3    |
| 0.124 | 1.5  |
| 0.101 | 0.75 |

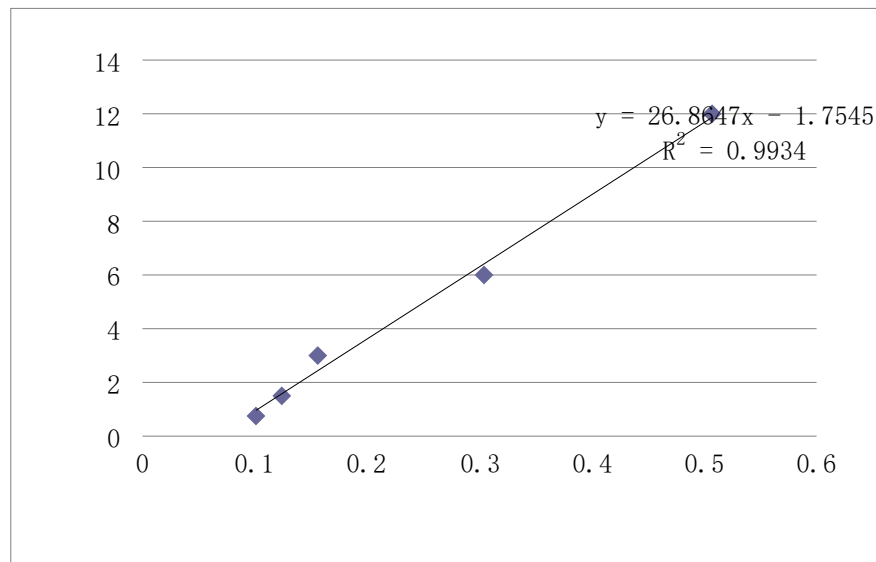

| Concentrations | 1 | 2    | 3     | 4     | 5     | 6     | 7    |
|----------------|---|------|-------|-------|-------|-------|------|
| A              |   | 6.44 | 11.38 | 9.77  | 9.53  | 9.42  | 8.83 |
| B              |   | 5.42 | 8.96  | 6.41  | 9.34  | 7.24  | 7.54 |
| C              |   | 5.04 | 10.12 | 8.48  | 9.69  | 8.88  | 8.72 |
| D              |   | 4.88 | 9.85  | 8.75  | 9.85  | 8.69  | 7.84 |
| E              |   | 6.30 | 10.90 | 10.01 | 10.95 | 10.39 | 9.42 |
| F              |   | 6.60 | 10.44 | 9.96  | 10.66 | 9.61  | 9.12 |
| G              |   | 6.06 | 10.84 | 9.63  | 10.39 | 9.47  | 9.37 |
| H              |   | 6.17 | 11.22 | 10.63 | 10.33 | 9.23  | 9.80 |

|            | K    | M     | DX   | D     | Z    | G    |
|------------|------|-------|------|-------|------|------|
| mean value | 5.86 | 10.46 | 9.20 | 10.09 | 9.12 | 8.83 |

|            |      |      |      |      |      |      |
|------------|------|------|------|------|------|------|
| standard d | 0.62 | 0.75 | 1.24 | 0.54 | 0.85 | 0.73 |
|------------|------|------|------|------|------|------|



GS

|   | 1     | 2     | 3     | 4     | 5     | 6     | 7     |  |  |  |     |
|---|-------|-------|-------|-------|-------|-------|-------|--|--|--|-----|
| A | 0.031 | 0.37  | 0.365 | 0.395 | 0.334 | 0.403 | 0.379 |  |  |  | 450 |
| B | 0.451 | 0.407 | 0.333 | 0.409 | 0.36  | 0.364 | 0.393 |  |  |  | 450 |
| C | 0.324 | 0.404 | 0.326 | 0.373 | 0.327 | 0.38  | 0.359 |  |  |  | 450 |
| D | 0.179 | 0.415 | 0.335 | 0.388 | 0.345 | 0.394 | 0.42  |  |  |  | 450 |
| E | 0.151 | 0.428 | 0.367 | 0.414 | 0.396 | 0.406 | 0.446 |  |  |  | 450 |
| F | 0.124 | 0.342 | 0.369 | 0.404 | 0.364 | 0.375 | 0.422 |  |  |  | 450 |
| G |       | 0.407 | 0.335 | 0.392 | 0.347 | 0.395 | 0.43  |  |  |  | 450 |
| H |       | 0.414 | 0.34  | 0.382 | 0.348 | 0.402 | 0.372 |  |  |  | 450 |

|   | 1     | 2     | 3     | 4     | 5     | 6     | 7     |
|---|-------|-------|-------|-------|-------|-------|-------|
| A | 0     | 0.339 | 0.334 | 0.364 | 0.303 | 0.372 | 0.348 |
| B | 0.42  | 0.376 | 0.302 | 0.378 | 0.329 | 0.333 | 0.362 |
| C | 0.293 | 0.373 | 0.295 | 0.342 | 0.296 | 0.349 | 0.328 |
| D | 0.148 | 0.384 | 0.304 | 0.357 | 0.314 | 0.363 | 0.389 |
| E | 0.12  | 0.397 | 0.336 | 0.383 | 0.365 | 0.375 | 0.415 |
| F | 0.093 | 0.311 | 0.338 | 0.373 | 0.333 | 0.344 | 0.391 |
| G |       | 0.376 | 0.304 | 0.361 | 0.316 | 0.364 | 0.399 |
| H |       | 0.383 | 0.309 | 0.351 | 0.317 | 0.371 | 0.341 |

| n mol/L |     |
|---------|-----|
| 0.42    | 40  |
| 0.293   | 20  |
| 0.148   | 10  |
| 0.12    | 5   |
| 0.093   | 2.5 |

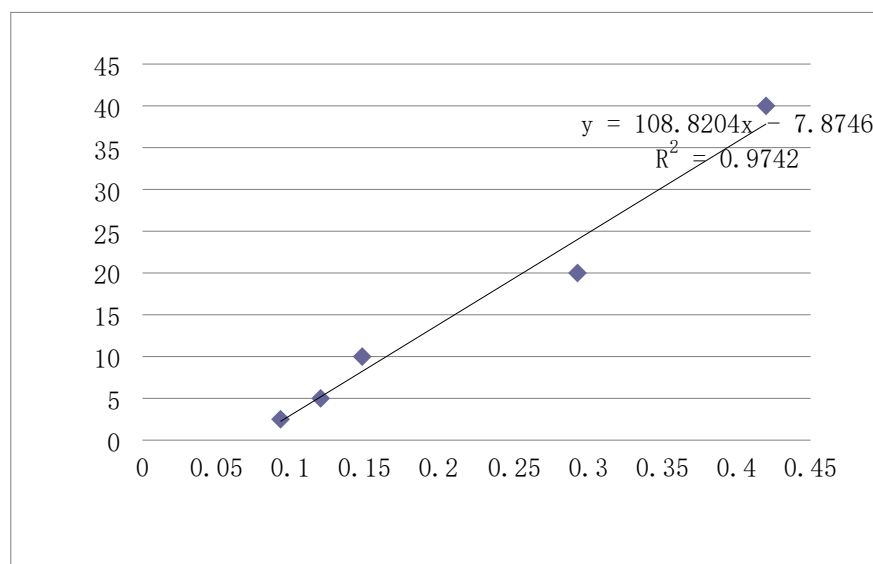

| Concentrations | 1 | 2     | 3     | 4     | 5     | 6     | 7     |
|----------------|---|-------|-------|-------|-------|-------|-------|
| A              |   | 29.01 | 28.47 | 31.73 | 25.09 | 32.60 | 29.99 |
| B              |   | 33.03 | 24.98 | 33.25 | 27.92 | 28.36 | 31.51 |
| C              |   | 32.71 | 24.22 | 29.34 | 24.33 | 30.10 | 27.81 |
| D              |   | 33.91 | 25.20 | 30.97 | 26.29 | 31.62 | 34.45 |
| E              |   | 35.32 | 28.68 | 33.80 | 31.84 | 32.93 | 37.28 |
| F              |   | 25.96 | 28.90 | 32.71 | 28.36 | 29.55 | 34.67 |
| G              |   | 33.03 | 25.20 | 31.40 | 26.51 | 31.73 | 35.54 |
| H              |   | 33.80 | 25.75 | 30.31 | 26.62 | 32.49 | 29.23 |

|            | K     | M     | DX    | D     | Z     | G     |
|------------|-------|-------|-------|-------|-------|-------|
| mean value | 32.10 | 26.43 | 31.69 | 27.12 | 31.17 | 32.56 |

|            |      |      |      |      |      |      |
|------------|------|------|------|------|------|------|
| standard d | 2.87 | 1.79 | 1.41 | 2.17 | 1.54 | 3.17 |
|------------|------|------|------|------|------|------|

| Replicate Group | Gabaar $\alpha$ 1 |                         |                               | $\beta$ -actin |                                           |                                                 | Efficiency                            | Relative Expression Ratio |    | mean value | standard deviation |
|-----------------|-------------------|-------------------------|-------------------------------|----------------|-------------------------------------------|-------------------------------------------------|---------------------------------------|---------------------------|----|------------|--------------------|
|                 | Ct (dRn)          | Ct <sub>Gabra1</sub> 正常 | $\Delta$ Ct <sub>Gabra1</sub> | Ct (dRn)       | Ct <sub><math>\beta</math>-actin</sub> 正常 | $\Delta$ Ct <sub><math>\beta</math>-actin</sub> |                                       |                           |    |            |                    |
| 1 K             | 26.24             | 26.67                   | 0.43                          | 27.56          | 27.85                                     | 0.29                                            | E <sub><math>\beta</math>-actin</sub> | 1.08                      |    |            |                    |
| 2 K             | 26.9              |                         | -0.23                         | 28.01          |                                           | -0.16                                           | 103.5%                                | 0.96                      |    |            |                    |
| 3 K             | 26.38             |                         | 0.29                          | 27.67          |                                           | 0.18                                            | E <sub>Gabra1</sub>                   | 1.06                      | K  | 1.00       | 0.07               |
| 4 K             | 26.91             |                         | -0.25                         | 28.16          |                                           | -0.31                                           | 95.8%                                 | 1.06                      | M  | 0.63       | 0.03               |
| 5 K             | 26.82             |                         | -0.16                         | 28.04          |                                           | -0.19                                           |                                       | 1.03                      | DX | 0.77       | 0.06               |
| 6 K             | 27.01             |                         | -0.35                         | 27.95          |                                           | -0.10                                           |                                       | 0.85                      | D  | 0.75       | 0.06               |
| 7 K             | 26.77             |                         | -0.11                         | 27.88          |                                           | -0.03                                           |                                       | 0.95                      | Z  | 0.93       | 0.07               |
| 8 K             | 26.29             |                         | 0.38                          | 27.54          |                                           | 0.31                                            |                                       | 1.03                      | G  | 1.01       | 0.08               |
| 9 M             | 27.39             |                         | -0.73                         | 27.91          |                                           | -0.06                                           |                                       | 0.64                      |    |            |                    |
| 10 M            | 27.42             |                         | -0.76                         | 27.92          |                                           | -0.07                                           |                                       | 0.63                      |    |            |                    |
| 11 M            | 26.89             |                         | -0.23                         | 27.53          |                                           | 0.32                                            |                                       | 0.68                      |    |            |                    |
| 12 M            | 27.66             |                         | -1.00                         | 28.21          |                                           | -0.36                                           |                                       | 0.66                      |    |            |                    |
| 13 M            | 28.09             |                         | -1.43                         | 28.48          |                                           | -0.63                                           |                                       | 0.60                      |    |            |                    |
| 14 M            | 27.72             |                         | -1.06                         | 28.25          |                                           | -0.40                                           |                                       | 0.65                      |    |            |                    |
| 15 M            | 27.02             |                         | -0.36                         | 27.52          |                                           | 0.33                                            |                                       | 0.62                      |    |            |                    |
| 16 M            | 28.08             |                         | -1.42                         | 28.4           |                                           | -0.55                                           |                                       | 0.57                      |    |            |                    |
| 17 DX           | 27.88             |                         | -1.22                         | 28.46          |                                           | -0.61                                           |                                       | 0.68                      |    |            |                    |
| 18 DX           | 27.67             |                         | -1.01                         | 28.34          |                                           | -0.49                                           |                                       | 0.72                      |    |            |                    |
| 19 DX           | 27.51             |                         | -0.85                         | 28.46          |                                           | -0.61                                           |                                       | 0.87                      |    |            |                    |
| 20 DX           | 27.46             |                         | -0.80                         | 28.13          |                                           | -0.28                                           |                                       | 0.71                      |    |            |                    |
| 21 DX           | 27.37             |                         | -0.71                         | 28.1           |                                           | -0.25                                           |                                       | 0.74                      |    |            |                    |
| 22 DX           | 26.85             |                         | -0.19                         | 27.77          |                                           | 0.08                                            |                                       | 0.83                      |    |            |                    |
| 23 DX           | 27.36             |                         | -0.70                         | 28.18          |                                           | -0.33                                           |                                       | 0.79                      |    |            |                    |
| 24 DX           | 27.12             |                         | -0.46                         | 27.9           |                                           | -0.05                                           |                                       | 0.76                      |    |            |                    |
| 25 D            | 27.16             |                         | -0.50                         | 28.08          |                                           | -0.23                                           |                                       | 0.84                      |    |            |                    |
| 26 D            | 27.24             |                         | -0.57                         | 28.17          |                                           | -0.32                                           |                                       | 0.85                      |    |            |                    |
| 27 D            | 27.64             |                         | -0.98                         | 28.32          |                                           | -0.47                                           |                                       | 0.72                      |    |            |                    |
| 28 D            | 27.4              |                         | -0.73                         | 28.2           |                                           | -0.35                                           |                                       | 0.78                      |    |            |                    |
| 29 D            | 26.86             |                         | -0.20                         | 27.56          |                                           | 0.29                                            |                                       | 0.71                      |    |            |                    |
| 30 D            | 27.12             |                         | -0.46                         | 27.84          |                                           | 0.01                                            |                                       | 0.73                      |    |            |                    |
| 31 D            | 27                |                         | -0.34                         | 27.65          |                                           | 0.20                                            |                                       | 0.69                      |    |            |                    |
| 32 D            | 27.52             |                         | -0.86                         | 28.12          |                                           | -0.27                                           |                                       | 0.68                      |    |            |                    |
| 33 Z            | 27.51             |                         | -0.85                         | 28.43          |                                           | -0.58                                           |                                       | 0.86                      |    |            |                    |
| 34 Z            | 27.01             |                         | -0.35                         | 27.99          |                                           | -0.14                                           |                                       | 0.88                      |    |            |                    |
| 35 Z            | 27.5              |                         | -0.84                         | 28.42          |                                           | -0.57                                           |                                       | 0.85                      |    |            |                    |
| 36 Z            | 26.28             |                         | 0.38                          | 27.52          |                                           | 0.33                                            |                                       | 1.02                      |    |            |                    |
| 37 Z            | 27.39             |                         | -0.73                         | 28.48          |                                           | -0.63                                           |                                       | 0.96                      |    |            |                    |
| 38 Z            | 27.18             |                         | -0.52                         | 28.18          |                                           | -0.33                                           |                                       | 0.89                      |    |            |                    |
| 39 Z            | 26.34             |                         | 0.32                          | 27.58          |                                           | 0.27                                            |                                       | 1.03                      |    |            |                    |
| 40 G            | 26.81             |                         | -0.15                         | 27.81          |                                           | 0.04                                            |                                       | 0.88                      |    |            |                    |
| 41 G            | 27.17             |                         | -0.51                         | 28.35          |                                           | -0.50                                           |                                       | 1.02                      |    |            |                    |
| 42 G            | 26.66             |                         | 0.00                          | 27.97          |                                           | -0.12                                           |                                       | 1.09                      |    |            |                    |
| 43 G            | 26.41             |                         | 0.25                          | 27.66          |                                           | 0.19                                            |                                       | 1.04                      |    |            |                    |
| 44 G            | 26.59             |                         | 0.07                          | 27.94          |                                           | -0.09                                           |                                       | 1.12                      |    |            |                    |
| 45 G            | 26.66             |                         | 0.00                          | 27.73          |                                           | 0.12                                            |                                       | 0.92                      |    |            |                    |

|      |  |       |       |  |       |       |  |      |
|------|--|-------|-------|--|-------|-------|--|------|
| 46 G |  | 26.82 | -0.16 |  | 27.97 | -0.12 |  | 0.98 |
| 47 G |  | 26.79 | -0.13 |  | 28.02 | -0.17 |  | 1.04 |

| Replicate Group | GluR-A   |                         |                       | β-actin  |                          |                        | Efficiency           | Relative Expression Ratio |            |                    |
|-----------------|----------|-------------------------|-----------------------|----------|--------------------------|------------------------|----------------------|---------------------------|------------|--------------------|
|                 | Ct (dRn) | Ct <sub>GluR-A</sub> 正常 | ΔCt <sub>GluR-A</sub> | Ct (dRn) | Ct <sub>β-actin</sub> 正常 | ΔCt <sub>β-actin</sub> |                      |                           | mean value | standard deviation |
| 1 K             | 29.12    | 29.31                   | 0.19                  | 27.56    | 27.85                    | 0.29                   | E <sub>β-actin</sub> | 0.92                      |            |                    |
| 2 K             | 29.41    |                         | -0.10                 | 28.01    |                          | -0.16                  | 103.5%               | 1.05                      |            |                    |
| 3 K             | 29.06    |                         | 0.25                  | 27.67    |                          | 0.18                   | E <sub>GluR-A</sub>  | 1.04                      | K          | 1.00 0.07          |
| 4 K             | 29.59    |                         | -0.28                 | 28.16    |                          | -0.31                  | 90.6%                | 1.04                      | M          | 3.28 0.24          |
| 5 K             | 29.4     |                         | -0.09                 | 28.04    |                          | -0.19                  |                      | 1.08                      | DX         | 2.42 0.28          |
| 6 K             | 29.6     |                         | -0.29                 | 27.95    |                          | -0.10                  |                      | 0.89                      | D          | 2.58 0.18          |
| 7 K             | 29.44    |                         | -0.13                 | 27.88    |                          | -0.03                  |                      | 0.94                      | Z          | 2.13 0.14          |
| 8 K             | 28.89    |                         | 0.42                  | 27.54    |                          | 0.31                   |                      | 1.05                      | G          | 1.85 0.17          |
| 9 M             | 27.66    |                         | 1.65                  | 27.91    |                          | -0.06                  |                      | 3.03                      |            |                    |
| 10 M            | 27.64    |                         | 1.67                  | 27.92    |                          | -0.07                  |                      | 3.09                      |            |                    |
| 11 M            | 26.97    |                         | 2.34                  | 27.53    |                          | 0.32                   |                      | 3.61                      |            |                    |
| 12 M            | 27.85    |                         | 1.46                  | 28.21    |                          | -0.36                  |                      | 3.32                      |            |                    |
| 13 M            | 28.31    |                         | 1.00                  | 28.48    |                          | -0.63                  |                      | 2.99                      |            |                    |
| 14 M            | 27.93    |                         | 1.38                  | 28.25    |                          | -0.40                  |                      | 3.24                      |            |                    |
| 15 M            | 27.13    |                         | 2.18                  | 27.52    |                          | 0.33                   |                      | 3.23                      |            |                    |
| 16 M            | 27.89    |                         | 1.42                  | 28.4     |                          | -0.55                  |                      | 3.70                      |            |                    |
| 17 DX           | 28.78    |                         | 0.53                  | 28.46    |                          | -0.61                  |                      | 2.17                      |            |                    |
| 18 DX           | 28.6     |                         | 0.71                  | 28.34    |                          | -0.49                  |                      | 2.24                      |            |                    |
| 19 DX           | 28.43    |                         | 0.88                  | 28.46    |                          | -0.61                  |                      | 2.73                      |            |                    |
| 20 DX           | 28.32    |                         | 0.99                  | 28.13    |                          | -0.28                  |                      | 2.31                      |            |                    |
| 21 DX           | 28.07    |                         | 1.24                  | 28.1     |                          | -0.25                  |                      | 2.66                      |            |                    |
| 22 DX           | 28.02    |                         | 1.29                  | 27.77    |                          | 0.08                   |                      | 2.17                      |            |                    |
| 23 DX           | 28.48    |                         | 0.83                  | 28.18    |                          | -0.33                  |                      | 2.16                      |            |                    |
| 24 DX           | 27.72    |                         | 1.59                  | 27.9     |                          | -0.05                  |                      | 2.89                      |            |                    |
| 25 D            | 27.99    |                         | 1.32                  | 28.08    |                          | -0.23                  |                      | 2.76                      |            |                    |
| 26 D            | 28.33    |                         | 0.98                  | 28.17    |                          | -0.32                  |                      | 2.37                      |            |                    |
| 27 D            | 28.39    |                         | 0.92                  | 28.32    |                          | -0.47                  |                      | 2.53                      |            |                    |
| 28 D            | 28.22    |                         | 1.09                  | 28.2     |                          | -0.35                  |                      | 2.59                      |            |                    |
| 29 D            | 27.49    |                         | 1.82                  | 27.56    |                          | 0.29                   |                      | 2.64                      |            |                    |
| 30 D            | 28.01    |                         | 1.30                  | 27.84    |                          | 0.01                   |                      | 2.30                      |            |                    |
| 31 D            | 27.44    |                         | 1.87                  | 27.65    |                          | 0.20                   |                      | 2.90                      |            |                    |
| 32 D            | 28.17    |                         | 1.14                  | 28.12    |                          | -0.27                  |                      | 2.53                      |            |                    |
| 33 Z            | 28.9     |                         | 0.41                  | 28.43    |                          | -0.58                  |                      | 1.97                      |            |                    |
| 34 Z            | 28.23    |                         | 1.08                  | 27.99    |                          | -0.14                  |                      | 2.22                      |            |                    |
| 35 Z            | 28.92    |                         | 0.39                  | 28.42    |                          | -0.57                  |                      | 1.93                      |            |                    |
| 36 Z            | 27.69    |                         | 1.62                  | 27.52    |                          | 0.33                   |                      | 2.25                      |            |                    |
| 37 Z            | 28.9     |                         | 0.41                  | 28.48    |                          | -0.63                  |                      | 2.04                      |            |                    |
| 38 Z            | 28.43    |                         | 0.88                  | 28.18    |                          | -0.33                  |                      | 2.23                      |            |                    |
| 39 Z            | 27.73    |                         | 1.58                  | 27.58    |                          | 0.27                   |                      | 2.29                      |            |                    |
| 40 G            | 28.15    |                         | 1.16                  | 27.81    |                          | 0.04                   |                      | 2.06                      |            |                    |
| 41 G            | 28.85    |                         | 0.46                  | 28.35    |                          | -0.50                  |                      | 1.92                      |            |                    |
| 42 G            | 28.57    |                         | 0.74                  | 27.97    |                          | -0.12                  |                      | 1.76                      |            |                    |
| 43 G            | 28.04    |                         | 1.27                  | 27.66    |                          | 0.19                   |                      | 1.99                      |            |                    |
| 44 G            | 28.36    |                         | 0.95                  | 27.94    |                          | -0.09                  |                      | 1.97                      |            |                    |
| 45 G            | 28.47    |                         | 0.84                  | 27.73    |                          | 0.12                   |                      | 1.58                      |            |                    |

|      |  |       |      |  |       |       |  |      |
|------|--|-------|------|--|-------|-------|--|------|
| 46 G |  | 28.7  | 0.61 |  | 27.97 | -0.12 |  | 1.62 |
| 47 G |  | 28.51 | 0.80 |  | 28.02 | -0.17 |  | 1.89 |

| Replicate Group | mGluR5   |                         |                       | β-actin  |                          |                        | Efficiency           | Relative Expression Ratio | mean valustandard deviation |           |
|-----------------|----------|-------------------------|-----------------------|----------|--------------------------|------------------------|----------------------|---------------------------|-----------------------------|-----------|
|                 | Ct (dRn) | Ct <sub>mGluR5</sub> 正常 | ΔCt <sub>mGluR5</sub> | Ct (dRn) | Ct <sub>β-actin</sub> 正常 | ΔCt <sub>β-actin</sub> |                      |                           |                             |           |
| 1 K             | 27.83    | 28.15                   | 0.32                  | 27.56    | 27.85                    | 0.29                   | E <sub>β-actin</sub> | 1.02                      |                             |           |
| 2 K             | 28.28    |                         | -0.13                 | 28.01    |                          | -0.16                  | 103.5%               | 1.02                      |                             |           |
| 3 K             | 28.06    |                         | 0.09                  | 27.67    |                          | 0.18                   | E <sub>mGluR5</sub>  | 0.94                      | K                           | 1.00 0.09 |
| 4 K             | 28.53    |                         | -0.38                 | 28.16    |                          | -0.31                  | 107.3%               | 0.94                      | M                           | 2.03 0.20 |
| 5 K             | 28.14    |                         | 0.01                  | 28.04    |                          | -0.19                  |                      | 1.15                      | DX                          | 1.37 0.07 |
| 6 K             | 28.29    |                         | -0.14                 | 27.95    |                          | -0.10                  |                      | 0.97                      | D                           | 1.52 0.11 |
| 7 K             | 28.01    |                         | 0.14                  | 27.88    |                          | -0.03                  |                      | 1.13                      | Z                           | 1.37 0.08 |
| 8 K             | 28.03    |                         | 0.12                  | 27.54    |                          | 0.31                   |                      | 0.87                      | G                           | 1.32 0.08 |
| 9 M             | 27.38    |                         | 0.77                  | 27.91    |                          | -0.06                  |                      | 1.82                      |                             |           |
| 10 M            | 27.37    |                         | 0.78                  | 27.92    |                          | -0.07                  |                      | 1.85                      |                             |           |
| 11 M            | 26.68    |                         | 1.47                  | 27.53    |                          | 0.32                   |                      | 2.32                      |                             |           |
| 12 M            | 27.44    |                         | 0.71                  | 28.21    |                          | -0.36                  |                      | 2.16                      |                             |           |
| 13 M            | 27.61    |                         | 0.54                  | 28.48    |                          | -0.63                  |                      | 2.31                      |                             |           |
| 14 M            | 27.68    |                         | 0.47                  | 28.25    |                          | -0.40                  |                      | 1.86                      |                             |           |
| 15 M            | 26.96    |                         | 1.19                  | 27.52    |                          | 0.33                   |                      | 1.88                      |                             |           |
| 16 M            | 27.72    |                         | 0.43                  | 28.4     |                          | -0.55                  |                      | 2.02                      |                             |           |
| 17 DX           | 28.42    |                         | -0.27                 | 28.46    |                          | -0.61                  |                      | 1.26                      |                             |           |
| 18 DX           | 28.24    |                         | -0.09                 | 28.34    |                          | -0.49                  |                      | 1.32                      |                             |           |
| 19 DX           | 28.37    |                         | -0.22                 | 28.46    |                          | -0.61                  |                      | 1.31                      |                             |           |
| 20 DX           | 28.04    |                         | 0.11                  | 28.13    |                          | -0.28                  |                      | 1.32                      |                             |           |
| 21 DX           | 27.94    |                         | 0.21                  | 28.1     |                          | -0.25                  |                      | 1.39                      |                             |           |
| 22 DX           | 27.54    |                         | 0.61                  | 27.77    |                          | 0.08                   |                      | 1.47                      |                             |           |
| 23 DX           | 27.99    |                         | 0.16                  | 28.18    |                          | -0.33                  |                      | 1.42                      |                             |           |
| 24 DX           | 27.67    |                         | 0.48                  | 27.9     |                          | -0.05                  |                      | 1.46                      |                             |           |
| 25 D            | 27.99    |                         | 0.16                  | 28.08    |                          | -0.23                  |                      | 1.32                      |                             |           |
| 26 D            | 27.8     |                         | 0.35                  | 28.17    |                          | -0.32                  |                      | 1.61                      |                             |           |
| 27 D            | 28.06    |                         | 0.09                  | 28.32    |                          | -0.47                  |                      | 1.49                      |                             |           |
| 28 D            | 27.98    |                         | 0.17                  | 28.2     |                          | -0.35                  |                      | 1.45                      |                             |           |
| 29 D            | 27.22    |                         | 0.93                  | 27.56    |                          | 0.29                   |                      | 1.60                      |                             |           |
| 30 D            | 27.63    |                         | 0.52                  | 27.84    |                          | 0.01                   |                      | 1.45                      |                             |           |
| 31 D            | 27.23    |                         | 0.92                  | 27.65    |                          | 0.20                   |                      | 1.69                      |                             |           |
| 32 D            | 27.79    |                         | 0.36                  | 28.12    |                          | -0.27                  |                      | 1.57                      |                             |           |
| 33 Z            | 28.2     |                         | -0.05                 | 28.43    |                          | -0.58                  |                      | 1.45                      |                             |           |
| 34 Z            | 27.85    |                         | 0.30                  | 27.99    |                          | -0.14                  |                      | 1.37                      |                             |           |
| 35 Z            | 28.32    |                         | -0.17                 | 28.42    |                          | -0.57                  |                      | 1.32                      |                             |           |
| 36 Z            | 27.44    |                         | 0.71                  | 27.52    |                          | 0.33                   |                      | 1.32                      |                             |           |
| 37 Z            | 28.24    |                         | -0.09                 | 28.48    |                          | -0.63                  |                      | 1.46                      |                             |           |
| 38 Z            | 28.18    |                         | -0.03                 | 28.18    |                          | -0.33                  |                      | 1.23                      |                             |           |
| 39 Z            | 27.41    |                         | 0.74                  | 27.58    |                          | 0.27                   |                      | 1.41                      |                             |           |
| 40 G            | 27.82    |                         | 0.33                  | 27.81    |                          | 0.04                   |                      | 1.23                      |                             |           |
| 41 G            | 28.39    |                         | -0.24                 | 28.35    |                          | -0.50                  |                      | 1.19                      |                             |           |
| 42 G            | 27.86    |                         | 0.29                  | 27.97    |                          | -0.12                  |                      | 1.34                      |                             |           |
| 43 G            | 27.54    |                         | 0.61                  | 27.66    |                          | 0.19                   |                      | 1.36                      |                             |           |
| 44 G            | 27.74    |                         | 0.41                  | 27.94    |                          | -0.09                  |                      | 1.43                      |                             |           |
| 45 G            | 27.56    |                         | 0.59                  | 27.73    |                          | 0.12                   |                      | 1.41                      |                             |           |

|      |  |       |      |  |       |       |  |      |
|------|--|-------|------|--|-------|-------|--|------|
| 46 G |  | 27.99 | 0.16 |  | 27.97 | -0.12 |  | 1.22 |
| 47 G |  | 27.91 | 0.24 |  | 28.02 | -0.17 |  | 1.34 |



| Replicate Group | NRI      |                      |                    | β-actin  |                          |                        | Efficiency           | Relative Expression Ratio | mean valustandard deviation |           |
|-----------------|----------|----------------------|--------------------|----------|--------------------------|------------------------|----------------------|---------------------------|-----------------------------|-----------|
|                 | Ct (dRn) | Ct <sub>NRI</sub> 正常 | ΔCt <sub>NRI</sub> | Ct (dRn) | Ct <sub>β-actin</sub> 正常 | ΔCt <sub>β-actin</sub> |                      |                           |                             |           |
| 1 K             | 28.1     | 28.47                | 0.37               | 27.56    | 27.85                    | 0.29                   | E <sub>β-actin</sub> | 1.06                      |                             |           |
| 2 K             | 28.73    |                      | -0.26              | 28.01    |                          | -0.16                  | 103.5%               | 0.93                      |                             |           |
| 3 K             | 28.21    |                      | 0.26               | 27.67    |                          | 0.18                   | E <sub>NRI</sub>     | 1.06                      | K                           | 1.00 0.06 |
| 4 K             | 28.94    |                      | -0.47              | 28.16    |                          | -0.31                  | 104.7%               | 0.89                      | M                           | 2.19 0.17 |
| 5 K             | 28.64    |                      | -0.17              | 28.04    |                          | -0.19                  |                      | 1.02                      | DX                          | 1.60 0.16 |
| 6 K             | 28.57    |                      | -0.10              | 27.95    |                          | -0.10                  |                      | 1.00                      | D                           | 1.42 0.11 |
| 7 K             | 28.47    |                      | 0.00               | 27.88    |                          | -0.03                  |                      | 1.02                      | Z                           | 1.24 0.12 |
| 8 K             | 28.13    |                      | 0.34               | 27.54    |                          | 0.31                   |                      | 1.03                      | G                           | 1.21 0.08 |
| 9 M             | 27.31    |                      | 1.16               | 27.91    |                          | -0.06                  |                      | 2.40                      |                             |           |
| 10 M            | 27.39    |                      | 1.08               | 27.92    |                          | -0.07                  |                      | 2.28                      |                             |           |
| 11 M            | 27.17    |                      | 1.30               | 27.53    |                          | 0.32                   |                      | 2.03                      |                             |           |
| 12 M            | 27.79    |                      | 0.68               | 28.21    |                          | -0.36                  |                      | 2.11                      |                             |           |
| 13 M            | 28.03    |                      | 0.44               | 28.48    |                          | -0.63                  |                      | 2.15                      |                             |           |
| 14 M            | 27.9     |                      | 0.57               | 28.25    |                          | -0.40                  |                      | 2.00                      |                             |           |
| 15 M            | 26.87    |                      | 1.60               | 27.52    |                          | 0.33                   |                      | 2.49                      |                             |           |
| 16 M            | 28.03    |                      | 0.44               | 28.4     |                          | -0.55                  |                      | 2.03                      |                             |           |
| 17 DX           | 28.55    |                      | -0.08              | 28.46    |                          | -0.61                  |                      | 1.46                      |                             |           |
| 18 DX           | 28.46    |                      | 0.01               | 28.34    |                          | -0.49                  |                      | 1.43                      |                             |           |
| 19 DX           | 28.28    |                      | 0.19               | 28.46    |                          | -0.61                  |                      | 1.77                      |                             |           |
| 20 DX           | 28.25    |                      | 0.22               | 28.13    |                          | -0.28                  |                      | 1.43                      |                             |           |
| 21 DX           | 27.96    |                      | 0.51               | 28.1     |                          | -0.25                  |                      | 1.72                      |                             |           |
| 22 DX           | 27.57    |                      | 0.90               | 27.77    |                          | 0.08                   |                      | 1.80                      |                             |           |
| 23 DX           | 28.06    |                      | 0.41               | 28.18    |                          | -0.33                  |                      | 1.70                      |                             |           |
| 24 DX           | 28       |                      | 0.47               | 27.9     |                          | -0.05                  |                      | 1.45                      |                             |           |
| 25 D            | 28.24    |                      | 0.23               | 28.08    |                          | -0.23                  |                      | 1.39                      |                             |           |
| 26 D            | 28.35    |                      | 0.12               | 28.17    |                          | -0.32                  |                      | 1.37                      |                             |           |
| 27 D            | 28.33    |                      | 0.14               | 28.32    |                          | -0.47                  |                      | 1.55                      |                             |           |
| 28 D            | 28.47    |                      | 0.00               | 28.2     |                          | -0.35                  |                      | 1.28                      |                             |           |
| 29 D            | 27.62    |                      | 0.85               | 27.56    |                          | 0.29                   |                      | 1.50                      |                             |           |
| 30 D            | 27.86    |                      | 0.61               | 27.84    |                          | 0.01                   |                      | 1.54                      |                             |           |
| 31 D            | 27.97    |                      | 0.50               | 27.65    |                          | 0.20                   |                      | 1.24                      |                             |           |
| 32 D            | 28.19    |                      | 0.28               | 28.12    |                          | -0.27                  |                      | 1.48                      |                             |           |
| 33 Z            | 28.82    |                      | -0.35              | 28.43    |                          | -0.58                  |                      | 1.18                      |                             |           |
| 34 Z            | 28.15    |                      | 0.32               | 27.99    |                          | -0.14                  |                      | 1.39                      |                             |           |
| 35 Z            | 28.6     |                      | -0.13              | 28.42    |                          | -0.57                  |                      | 1.37                      |                             |           |
| 36 Z            | 28.03    |                      | 0.44               | 27.52    |                          | 0.33                   |                      | 1.09                      |                             |           |
| 37 Z            | 28.87    |                      | -0.40              | 28.48    |                          | -0.63                  |                      | 1.18                      |                             |           |
| 38 Z            | 28.63    |                      | -0.16              | 28.18    |                          | -0.33                  |                      | 1.13                      |                             |           |
| 39 Z            | 27.8     |                      | 0.67               | 27.58    |                          | 0.27                   |                      | 1.34                      |                             |           |
| 40 G            | 28.25    |                      | 0.22               | 27.81    |                          | 0.04                   |                      | 1.14                      |                             |           |
| 41 G            | 28.83    |                      | -0.36              | 28.35    |                          | -0.50                  |                      | 1.10                      |                             |           |
| 42 G            | 28.44    |                      | 0.03               | 27.97    |                          | -0.12                  |                      | 1.11                      |                             |           |
| 43 G            | 27.9     |                      | 0.57               | 27.66    |                          | 0.19                   |                      | 1.32                      |                             |           |
| 44 G            | 28.27    |                      | 0.20               | 27.94    |                          | -0.09                  |                      | 1.23                      |                             |           |
| 45 G            | 28.04    |                      | 0.43               | 27.73    |                          | 0.12                   |                      | 1.25                      |                             |           |

|      |  |       |      |  |       |       |  |      |
|------|--|-------|------|--|-------|-------|--|------|
| 46 G |  | 28.23 | 0.24 |  | 27.97 | -0.12 |  | 1.30 |
| 47 G |  | 28.38 | 0.09 |  | 28.02 | -0.17 |  | 1.21 |
